# Supplementary material for: Tautomerism and antioxidant activity of some 4-acylpyrazolone-based Schiff bases: a theoretical study
Source: PubMed Central journal article supplement (PMC9085507; doi:10.1039/c8ra05987j), 2018-09-03
Supplement: RA-008-C8RA05987J-s001.pdf [file RA-008-C8RA05987J-s001.pdf]

**Supporting Information for:**

# Tautomerism and antioxidant activity of some 4-acylpyrazolone-based Schiff Bases: a theoretical study

Esam A. Orabi<sup>1,†,\*</sup>

<sup>1</sup> Department of Chemistry, Faculty of Science, Assiut University, Assiut 71516, Egypt

<sup>†</sup> Current address: Center for Research in Molecular Modeling (CERMM) and Department of Chemistry and Biochemistry, Concordia University, 7141 Sherbrooke Street West, Montréal, Québec H4B 1R6, Canada

\* E-mail: [e\\_orabi@live.concordia.ca](mailto:e_orabi@live.concordia.ca) and [orabiesam@gmail.com](mailto:orabiesam@gmail.com)

Tel.: +1-514-848-2424, extension 5835; Fax: +1-514-848-2868

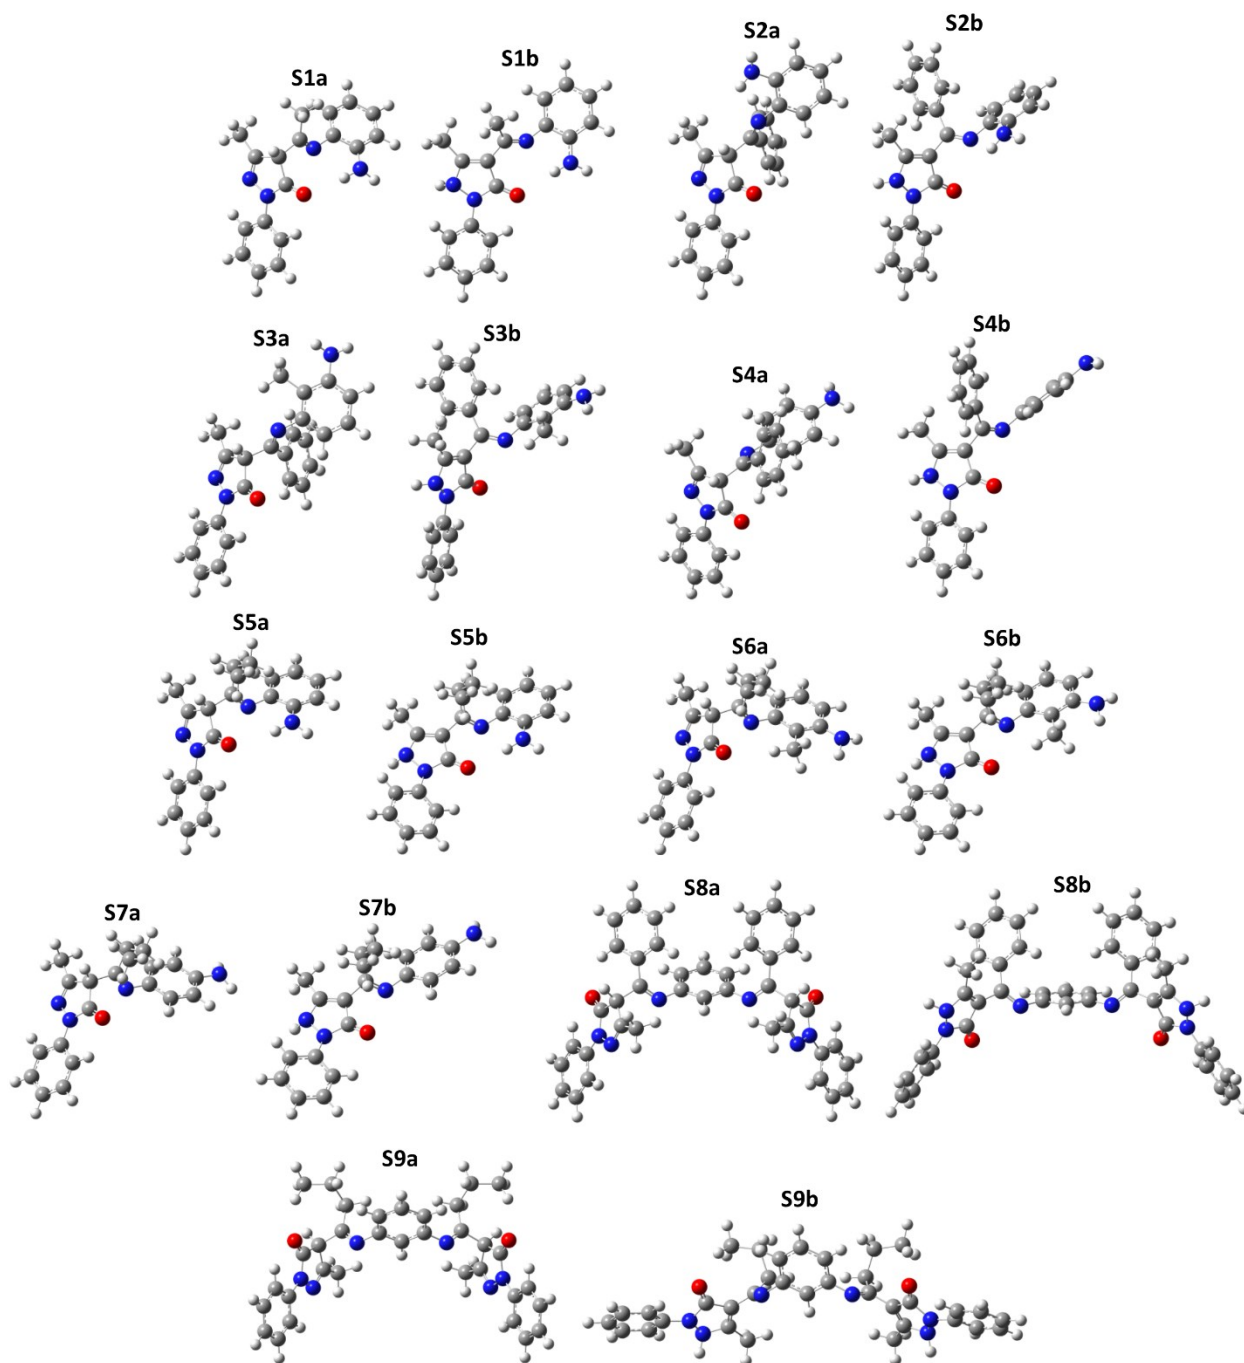

**Figure S1.** Optimized gas-phase geometry of the *global minimum* conformers of the imine-one(I) (a) and imine-one(II) (b) tautomeric forms of pyrazolone Schiff bases **1–9** at the B3LYP/6-311++G(d,p) level of theory. Atom color code: H (white), C (gray), N (blue), and O (red). For clarity of the structures, intramolecular H-bonds are not shown. The atomic coordinates are provided below.

**Table S1.** Properties of imine-one(I) and imine-one(II) tautomers of compounds **1–9** in gas phase <sup>a</sup>

| Property         | <b>1</b>       |                | <b>2</b>       |                | <b>3</b>       |                | <b>4</b>       |                | <b>5</b>       |                | <b>6</b>       |                | <b>7</b>       |                | <b>8</b>       |                | <b>9</b>       |                |
|------------------|----------------|----------------|----------------|----------------|----------------|----------------|----------------|----------------|----------------|----------------|----------------|----------------|----------------|----------------|----------------|----------------|----------------|----------------|
|                  | imine-one(I)   | imine-one(II)  | imine-one(I)   | imine-one(II)  | imine-one(I)   | imine-one(II)  | imine-one(I)   | imine-one(II)  | imine-one(I)   | imine-one(II)  | imine-one(I)   | imine-one(II)  | imine-one(I)   | imine-one(II)  | imine-one(I)   | imine-one(II)  | imine-one(I)   | imine-one(II)  |
| $\Delta E^b$     | 17.9<br>(16.6) | 19.1<br>(18.3) | 17.0<br>(16.2) | 19.9<br>(19.2) | 18.4<br>(17.2) | 21.6<br>(20.6) | 17.5<br>(16.5) | 22.5<br>(21.6) | 17.5<br>(16.3) | 19.1<br>(18.3) | 18.6<br>(17.3) | 21.4<br>(20.4) | 20.0<br>(18.6) | 23.3<br>(22.2) | 33.7<br>(31.9) | 43.5<br>(41.7) | 35.5<br>(33.2) | 42.2<br>(40.3) |
| IPV              | 163.2          | 154.3          | 164.0          | 155.4          | 163.7          | 158.0          | 159.9          | 153.3          | 162.7          | 154.7          | 163.6          | 160.3          | 160.3          | 155.8          | 163.3          | 155.4          | 163.1          | 158.5          |
| BDE <sup>b</sup> | 75.1<br>(67.3) | 73.8<br>(65.5) | 74.0<br>(65.8) | 71.2<br>(62.8) | 77.9<br>(69.9) | 74.8<br>(66.5) | 78.7<br>(70.4) | 73.7<br>(65.3) | 76.3<br>(68.3) | 74.7<br>(66.4) | 78.8<br>(70.8) | 76.0<br>(67.7) | 76.5<br>(68.9) | 73.2<br>(65.3) | 62.0<br>(54.8) | 52.3<br>(45.0) | 60.7<br>(53.9) | 54.0<br>(46.8) |
| Dipole           | 3.11           | 5.88           | 3.22           | 5.85           | 3.86           | 5.26           | 3.74           | 4.50           | 3.02           | 5.71           | 2.86           | 4.19           | 4.15           | 4.77           | 6.32           | 10.75          | 7.19           | 10.73          |
| $r_{N_1N_2}$     | 1.400          | 1.400          | 1.402          | 1.400          | 1.402          | 1.403          | 1.405          | 1.403          | 1.401          | 1.402          | 1.401          | 1.403          | 1.401          | 1.403          | 1.404          | 1.403          | 1.401          | 1.403          |
| $r_{N_2C_3}$     | 1.281          | 1.389          | 1.282          | 1.385          | 1.282          | 1.390          | 1.281          | 1.391          | 1.281          | 1.391          | 1.281          | 1.393          | 1.281          | 1.393          | 1.281          | 1.390          | 1.281          | 1.393          |
| $r_{C_3C_4}$     | 1.512          | 1.363          | 1.510          | 1.365          | 1.509          | 1.360          | 1.507          | 1.360          | 1.511          | 1.360          | 1.510          | 1.358          | 1.510          | 1.357          | 1.508          | 1.359          | 1.510          | 1.357          |
| $r_{C_4C_5}$     | 1.536          | 1.477          | 1.538          | 1.475          | 1.538          | 1.474          | 1.541          | 1.473          | 1.534          | 1.474          | 1.535          | 1.472          | 1.536          | 1.473          | 1.542          | 1.473          | 1.538          | 1.472          |
| $r_{C_4C_7}$     | 1.528          | 1.474          | 1.523          | 1.478          | 1.525          | 1.484          | 1.532          | 1.484          | 1.529          | 1.478          | 1.531          | 1.483          | 1.532          | 1.484          | 1.532          | 1.484          | 1.531          | 1.485          |
| $r_{C_5O_6}$     | 1.212          | 1.218          | 1.213          | 1.214          | 1.213          | 1.215          | 1.215          | 1.216          | 1.214          | 1.219          | 1.213          | 1.218          | 1.212          | 1.216          | 1.215          | 1.215          | 1.213          | 1.216          |
| $r_{C_5N_1}$     | 1.387          | 1.414          | 1.388          | 1.420          | 1.388          | 1.416          | 1.383          | 1.416          | 1.386          | 1.411          | 1.386          | 1.414          | 1.387          | 1.415          | 1.382          | 1.416          | 1.385          | 1.414          |
| $r_{C_7N_8}$     | 1.272          | 1.279          | 1.279          | 1.283          | 1.276          | 1.279          | 1.277          | 1.280          | 1.272          | 1.277          | 1.271          | 1.276          | 1.272          | 1.276          | 1.276          | 1.278          | 1.272          | 1.275          |
| $r_{C_4H}$       | 1.097          | –              | 1.096          | –              | 1.096          | –              | 1.096          | –              | 1.095          | –              | 1.095          | –              | 1.095          | –              | 1.095          | –              | 1.094          | –              |
| $r_{N_2H}$       | –              | 1.017          | –              | 1.017          | –              | 1.017          | –              | 1.017          | –              | 1.017          | –              | 1.017          | –              | 1.018          | –              | 1.017          | –              | 1.018          |
| $\delta^c$       | 3.97           | 5.09           | 4.54           | 5.28           | 4.62           | 5.12           | 4.35           | 5.05           | 4.17           | 5.13           | 4.15           | 5.09           | 4.10           | 5.03           | 4.41           | 5.11           | 4.12           | 5.09           |

<sup>a</sup> Calculated in the gas phase at the B3LYP/6-311++G(d,p) level.  $\Delta E$ , IPV, and BDE in kcal/mol, dipole moment in debye, and  $r$  in Å.  $\Delta E$  is the difference in energy between a given isomer and the amine-one tautomer. <sup>b</sup>  $\Delta E$  and BDE corrected for ZPE are reported in brackets.

<sup>c</sup> Calculated chemical shifts (in ppm) for H at C<sub>4</sub> (imine-one(I)) or at N<sub>2</sub> (imine-one(II)).

**Table S2.** Properties of amine-one and imine-ol tautomers of compounds **1–9** in chloroform <sup>a</sup>

| Property         | <b>1</b>       |                | <b>2</b>       |                | <b>3</b>       |                | <b>4</b>       |                | <b>5</b>       |                | <b>6</b>       |                | <b>7</b>       |                | <b>8</b>       |                | <b>9</b>       |                |
|------------------|----------------|----------------|----------------|----------------|----------------|----------------|----------------|----------------|----------------|----------------|----------------|----------------|----------------|----------------|----------------|----------------|----------------|----------------|
|                  | amine-one      | imine-ol       | amine-one      | imine-ol       | amine-one      | imine-ol       | amine-one      | imine-ol       | amine-one      | imine-ol       | amine-one      | imine-ol       | amine-one      | imine-ol       | amine-one      | imine-ol       | amine-one      | imine-ol       |
| $\Delta E^b$     | 0.0<br>(0.0)   | 8.0<br>(7.4)   | 0.0<br>(0.0)   | 8.0<br>(7.4)   | 0.0<br>(0.0)   | 8.8<br>(7.9)   | 0.0<br>(0.0)   | 9.3<br>(8.3)   | 0.0<br>(0.0)   | 8.7<br>(7.8)   | 0.0<br>(0.0)   | 9.2<br>(8.1)   | 0.0<br>(0.0)   | 9.9<br>(8.4)   | 0.0<br>(0.0)   | 16.3<br>(14.7) | 0.0<br>(0.0)   | 16.2<br>(14.1) |
| IPV <sup>c</sup> | 148.7          | 146.9          | 147.9          | 145.9          | 146.2          | 148.0          | 143.0          | 140.9          | 147.9          | 147.0          | 146.7          | 148.9          | 144.9          | 143.3          | 144.9          | 149.4          | 145.5          | 152.7          |
| BDE <sup>b</sup> | 93.9<br>(85.1) | 85.8<br>(77.7) | 92.3<br>(83.4) | 84.3<br>(76.0) | 96.5<br>(87.3) | 87.7<br>(79.4) | 94.6<br>(85.6) | 85.3<br>(77.3) | 94.2<br>(85.3) | 85.5<br>(77.5) | 97.9<br>(88.6) | 88.7<br>(80.5) | 95.2<br>(86.2) | 85.3<br>(77.8) | 95.7<br>(86.8) | 79.5<br>(72.0) | 96.4<br>(87.2) | 80.2<br>(73.1) |
| Dipole           | 7.41           | 1.60           | 7.26           | 1.76           | 8.28           | 3.29           | 9.67           | 4.87           | 6.87           | 1.99           | 8.16           | 3.52           | 9.52           | 4.67           | 14.32          | 6.27           | 9.16           | 4.91           |
| $r_{N_1N_2}$     | 1.394          | 1.387          | 1.395          | 1.388          | 1.395          | 1.388          | 1.395          | 1.388          | 1.393          | 1.387          | 1.392          | 1.387          | 1.392          | 1.387          | 1.395          | 1.388          | 1.393          | 1.386          |
| $r_{N_2C_3}$     | 1.307          | 1.321          | 1.307          | 1.321          | 1.308          | 1.321          | 1.308          | 1.321          | 1.308          | 1.320          | 1.308          | 1.321          | 1.308          | 1.321          | 1.306          | 1.320          | 1.307          | 1.320          |
| $r_{C_3C_4}$     | 1.444          | 1.432          | 1.444          | 1.434          | 1.444          | 1.433          | 1.443          | 1.433          | 1.445          | 1.436          | 1.445          | 1.435          | 1.445          | 1.434          | 1.446          | 1.434          | 1.446          | 1.435          |
| $r_{C_4C_5}$     | 1.455          | 1.402          | 1.456          | 1.403          | 1.456          | 1.404          | 1.455          | 1.404          | 1.456          | 1.406          | 1.456          | 1.406          | 1.455          | 1.407          | 1.459          | 1.405          | 1.458          | 1.406          |
| $r_{C_4C_7}$     | 1.398          | 1.450          | 1.396          | 1.448          | 1.398          | 1.449          | 1.400          | 1.449          | 1.401          | 1.449          | 1.403          | 1.451          | 1.403          | 1.449          | 1.395          | 1.447          | 1.398          | 1.450          |
| $r_{C_5O_6}$     | 1.248          | 1.322          | 1.247          | 1.322          | 1.247          | 1.320          | 1.248          | 1.319          | 1.249          | 1.318          | 1.249          | 1.317          | 1.249          | 1.314          | 1.247          | 1.319          | 1.248          | 1.318          |
| $r_{C_5N_1}$     | 1.387          | 1.353          | 1.386          | 1.352          | 1.386          | 1.353          | 1.387          | 1.354          | 1.386          | 1.353          | 1.386          | 1.354          | 1.387          | 1.355          | 1.384          | 1.352          | 1.385          | 1.353          |
| $r_{C_7N_8}$     | 1.344          | 1.304          | 1.345          | 1.305          | 1.343          | 1.302          | 1.342          | 1.305          | 1.346          | 1.307          | 1.345          | 1.305          | 1.342          | 1.306          | 1.348          | 1.304          | 1.347          | 1.304          |
| $r_{O_6H}$       | –              | 1.021          | –              | 1.017          | –              | 1.025          | –              | 1.032          | –              | 1.033          | –              | 1.040          | –              | 1.054          | –              | 1.023          | –              | 1.032          |
| $r_{N_8H}$       | 1.028          | –              | 1.029          | –              | 1.028          | –              | 1.029          | –              | 1.031          | –              | 1.030          | –              | 1.029          | –              | 1.030          | –              | 1.031          | –              |

<sup>a</sup> Calculated at the B3LYP/6-311++G(d,p) level in chloroform using the PCM model.  $\Delta E$ , IPV, and BDE in kcal/mol, dipole moment in debye, and  $r$  in Å.  $\Delta E$  is the difference in energy between a given isomer and the amine-one tautomer. <sup>b</sup>  $\Delta E$  and BDE corrected for ZPE are reported in brackets. <sup>c</sup> IPV is calculated using the non-equilibrium polarizable continuum model.

**Table S3.** Properties of amine-one and imine-ol tautomers of compounds **1–9** in DMSO <sup>a</sup>

| Property         | <b>1</b>       |                | <b>2</b>       |                | <b>3</b>       |                | <b>4</b>       |                | <b>5</b>       |                | <b>6</b>       |                | <b>7</b>       |                | <b>8</b>       |                | <b>9</b>       |                |
|------------------|----------------|----------------|----------------|----------------|----------------|----------------|----------------|----------------|----------------|----------------|----------------|----------------|----------------|----------------|----------------|----------------|----------------|----------------|
|                  | amine-one      | imine-ol       | amine-one      | imine-ol       | amine-one      | imine-ol       | amine-one      | imine-ol       | amine-one      | imine-ol       | amine-one      | imine-ol       | amine-one      | imine-ol       | amine-one      | imine-ol       | amine-one      | imine-ol       |
| $\Delta E^b$     | 0.0<br>(0.0)   | 8.7<br>(8.1)   | 0.0<br>(0.0)   | 8.5<br>(8.0)   | 0.0<br>(0.0)   | 9.3<br>(8.3)   | 0.0<br>(0.0)   | 9.9<br>(8.8)   | 0.0<br>(0.0)   | 9.2<br>(8.3)   | 0.0<br>(0.0)   | 9.8<br>(8.5)   | 0.0<br>(0.0)   | 10.5<br>(8.6)  | 0.0<br>(0.0)   | 17.3<br>(15.7) | 0.0<br>(0.0)   | 17.6<br>(15.4) |
| IPV <sup>c</sup> | 150.6          | 149.1          | 150.5          | 148.6          | 149.3          | 150.8          | 145.9          | 143.6          | 150.5          | 149.2          | 149.7          | 151.3          | 147.6          | 145.4          | 148.0          | 152.5          | 148.1          | 155.2          |
| BDE <sup>b</sup> | 94.0<br>(85.4) | 85.3<br>(77.3) | 92.6<br>(84.0) | 84.1<br>(76.0) | 96.3<br>(87.1) | 87.0<br>(78.8) | 92.8<br>(84.1) | 82.9<br>(75.3) | 93.5<br>(84.5) | 84.3<br>(76.2) | 98.8<br>(89.6) | 89.1<br>(81.1) | 93.6<br>(84.5) | 83.1<br>(75.9) | 95.6<br>(86.6) | 78.3<br>(71.0) | 96.2<br>(87.1) | 78.6<br>(71.7) |
| Dipole           | 7.56           | 1.67           | 7.58           | 1.65           | 8.76           | 3.36           | 9.78           | 5.01           | 7.38           | 2.03           | 8.68           | 3.69           | 10.19          | 5.05           | 15.45          | 6.40           | 10.19          | 5.37           |
| $r_{N_1N_2}$     | 1.395          | 1.387          | 1.396          | 1.388          | 1.397          | 1.388          | 1.395          | 1.388          | 1.394          | 1.387          | 1.393          | 1.387          | 1.393          | 1.388          | 1.396          | 1.388          | 1.393          | 1.387          |
| $r_{N_2C_3}$     | 1.309          | 1.322          | 1.308          | 1.322          | 1.309          | 1.322          | 1.309          | 1.322          | 1.309          | 1.322          | 1.310          | 1.322          | 1.310          | 1.322          | 1.308          | 1.322          | 1.309          | 1.322          |
| $r_{C_3C_4}$     | 1.441          | 1.432          | 1.443          | 1.433          | 1.443          | 1.433          | 1.442          | 1.433          | 1.444          | 1.435          | 1.444          | 1.434          | 1.444          | 1.434          | 1.444          | 1.433          | 1.445          | 1.435          |
| $r_{C_4C_5}$     | 1.450          | 1.401          | 1.454          | 1.403          | 1.454          | 1.403          | 1.453          | 1.404          | 1.454          | 1.406          | 1.454          | 1.406          | 1.453          | 1.407          | 1.456          | 1.404          | 1.456          | 1.406          |
| $r_{C_4C_7}$     | 1.401          | 1.450          | 1.397          | 1.448          | 1.400          | 1.449          | 1.402          | 1.450          | 1.403          | 1.450          | 1.405          | 1.451          | 1.406          | 1.449          | 1.397          | 1.447          | 1.402          | 1.451          |
| $r_{C_5O_6}$     | 1.250          | 1.322          | 1.248          | 1.322          | 1.249          | 1.320          | 1.249          | 1.319          | 1.250          | 1.318          | 1.250          | 1.317          | 1.251          | 1.313          | 1.248          | 1.320          | 1.250          | 1.318          |
| $r_{C_5N_1}$     | 1.388          | 1.353          | 1.386          | 1.351          | 1.387          | 1.352          | 1.387          | 1.353          | 1.387          | 1.352          | 1.386          | 1.354          | 1.388          | 1.355          | 1.385          | 1.352          | 1.385          | 1.352          |
| $r_{C_7N_8}$     | 1.341          | 1.304          | 1.343          | 1.304          | 1.341          | 1.302          | 1.340          | 1.305          | 1.344          | 1.307          | 1.341          | 1.304          | 1.340          | 1.307          | 1.346          | 1.304          | 1.344          | 1.304          |
| $r_{O_6H}$       | –              | 1.022          | –              | 1.018          | –              | 1.026          | –              | 1.034          | –              | 1.034          | –              | 1.044          | –              | 1.068          | –              | 1.024          | –              | 1.035          |
| $r_{N_8H}$       | 1.029          | –              | 1.028          | –              | 1.027          | –              | 1.027          | –              | 1.030          | –              | 1.029          | –              | 1.028          | –              | 1.029          | –              | 1.030          | –              |

<sup>a</sup> Calculated at the B3LYP/6-311++G(d,p) level in DMSO using the PCM model.  $\Delta E$ , IPV, and BDE in kcal/mol, dipole moment in debye, and  $r$  in Å.  $\Delta E$  is the difference in energy between a given isomer and the amine-one tautomer. <sup>b</sup>  $\Delta E$  and BDE corrected for ZPE are reported in brackets. <sup>c</sup> IPV is calculated using the non-equilibrium polarizable continuum model.

**Table S4.** Properties of amine-one and imine-ol tautomers of compounds **1–9** in water <sup>a</sup>

| Property         | <b>1</b>       |                | <b>2</b>       |                | <b>3</b>       |                | <b>4</b>       |                | <b>5</b>       |                | <b>6</b>       |                | <b>7</b>       |                | <b>8</b>       |                | <b>9</b>       |                |
|------------------|----------------|----------------|----------------|----------------|----------------|----------------|----------------|----------------|----------------|----------------|----------------|----------------|----------------|----------------|----------------|----------------|----------------|----------------|
|                  | amine-one      | imine-ol       | amine-one      | imine-ol       | amine-one      | imine-ol       | amine-one      | imine-ol       | amine-one      | imine-ol       | amine-one      | imine-ol       | amine-one      | imine-ol       | amine-one      | imine-ol       | amine-one      | imine-ol       |
| $\Delta E^b$     | 0.0<br>(0.0)   | 8.7<br>(8.1)   | 0.0<br>(0.0)   | 8.5<br>(7.9)   | 0.0<br>(0.0)   | 9.3<br>(8.4)   | 0.0<br>(0.0)   | 9.9<br>(8.9)   | 0.0<br>(0.0)   | 9.3<br>(8.3)   | 0.0<br>(0.0)   | 9.8<br>(8.5)   | 0.0<br>(0.0)   | 10.5<br>(8.6)  | 0.0<br>(0.0)   | 17.5<br>(15.9) | 0.0<br>(0.0)   | 17.7<br>(15.5) |
| IPV <sup>c</sup> | 152.4          | 151.0          | 152.1          | 150.3          | 150.8          | 152.6          | 147.3          | 145.3          | 152.1          | 150.9          | 151.2          | 153.0          | 149.1          | 147.2          | 149.0          | 153.6          | 149.2          | 156.1          |
| BDE <sup>b</sup> | 94.0<br>(85.4) | 85.3<br>(77.3) | 92.6<br>(83.9) | 84.1<br>(76.0) | 96.3<br>(87.2) | 87.0<br>(78.7) | 92.7<br>(84.1) | 82.7<br>(75.2) | 93.5<br>(84.4) | 84.2<br>(76.1) | 98.8<br>(89.6) | 89.0<br>(81.1) | 93.5<br>(84.4) | 83.0<br>(75.9) | 95.6<br>(86.7) | 78.2<br>(70.8) | 96.2<br>(87.2) | 78.5<br>(71.7) |
| Dipole           | 7.72           | 1.68           | 7.69           | 1.64           | 8.74           | 3.35           | 9.80           | 5.02           | 7.42           | 2.04           | 8.70           | 3.71           | 10.11          | 5.08           | 15.11          | 6.38           | 10.28          | 5.40           |
| $r_{N_1N_2}$     | 1.395          | 1.387          | 1.396          | 1.388          | 1.395          | 1.388          | 1.394          | 1.388          | 1.394          | 1.387          | 1.393          | 1.387          | 1.393          | 1.388          | 1.395          | 1.388          | 1.393          | 1.387          |
| $r_{N_2C_3}$     | 1.309          | 1.323          | 1.308          | 1.322          | 1.309          | 1.322          | 1.310          | 1.322          | 1.309          | 1.322          | 1.310          | 1.322          | 1.310          | 1.322          | 1.308          | 1.322          | 1.309          | 1.322          |
| $r_{C_3C_4}$     | 1.441          | 1.432          | 1.443          | 1.433          | 1.443          | 1.433          | 1.443          | 1.433          | 1.444          | 1.435          | 1.444          | 1.434          | 1.444          | 1.434          | 1.445          | 1.433          | 1.446          | 1.435          |
| $r_{C_4C_5}$     | 1.450          | 1.401          | 1.454          | 1.403          | 1.454          | 1.403          | 1.453          | 1.404          | 1.454          | 1.406          | 1.454          | 1.406          | 1.453          | 1.408          | 1.456          | 1.404          | 1.455          | 1.406          |
| $r_{C_4C_7}$     | 1.401          | 1.450          | 1.398          | 1.448          | 1.400          | 1.449          | 1.402          | 1.450          | 1.404          | 1.450          | 1.405          | 1.451          | 1.406          | 1.449          | 1.397          | 1.447          | 1.402          | 1.451          |
| $r_{C_5O_6}$     | 1.250          | 1.322          | 1.248          | 1.322          | 1.249          | 1.321          | 1.249          | 1.319          | 1.250          | 1.318          | 1.250          | 1.317          | 1.251          | 1.313          | 1.248          | 1.320          | 1.250          | 1.318          |
| $r_{C_5N_1}$     | 1.389          | 1.353          | 1.387          | 1.351          | 1.386          | 1.352          | 1.387          | 1.353          | 1.387          | 1.352          | 1.386          | 1.353          | 1.387          | 1.355          | 1.384          | 1.351          | 1.385          | 1.352          |
| $r_{C_7N_8}$     | 1.340          | 1.304          | 1.343          | 1.304          | 1.341          | 1.302          | 1.340          | 1.305          | 1.344          | 1.307          | 1.341          | 1.305          | 1.340          | 1.307          | 1.346          | 1.304          | 1.344          | 1.304          |
| $r_{O_6H}$       | –              | 1.022          | –              | 1.017          | –              | 1.025          | –              | 1.034          | –              | 1.034          | –              | 1.044          | –              | 1.069          | –              | 1.024          | –              | 1.035          |

|                 |       |   |       |   |       |   |       |   |       |   |       |   |       |   |       |   |       |   |
|-----------------|-------|---|-------|---|-------|---|-------|---|-------|---|-------|---|-------|---|-------|---|-------|---|
| $r_{N\delta H}$ | 1.028 | - | 1.028 | - | 1.028 | - | 1.027 | - | 1.030 | - | 1.029 | - | 1.028 | - | 1.028 | - | 1.030 | - |
|-----------------|-------|---|-------|---|-------|---|-------|---|-------|---|-------|---|-------|---|-------|---|-------|---|

<sup>a</sup> Calculated at the B3LYP/6-311++G(d,p) level in water using the PCM model.  $\Delta E$ , IPV, and BDE in kcal/mol, dipole moment in debye, and  $r$  in Å.  $\Delta E$  is the difference in energy between a given isomer and the amine-one tautomer. <sup>b</sup>  $\Delta E$  and BDE corrected for ZPE are reported in brackets. <sup>c</sup> IPV is calculated using the non-equilibrium polarizable continuum model.

**Table S5.** Total energy (a.u.) of amine-one, imine-ol, imine-one(I), and imine-one(II) tautomeric forms of compounds **1–9** calculated at the B3LYP/6-311++G(d,p) level of theory in gas phase, chloroform, DMSO, and water.<sup>a</sup>

| Compound | Tautomer      | Gas phase    | Chloroform   | DMSO         | Water        |
|----------|---------------|--------------|--------------|--------------|--------------|
| <b>1</b> | amine-one     | -991.260472  | -991.270863  | -991.275622  | -991.275878  |
|          | imine-ol      | -991.249972  | -991.258072  | -991.261778  | -991.261984  |
|          | imine-one(I)  | -991.232011  |              |              |              |
|          | imine-one(II) | -991.229999  |              |              |              |
| <b>2</b> | amine-one     | -1183.037979 | -1183.048936 | -1183.053786 | -1183.054018 |
|          | imine-ol      | -1183.027678 | -1183.036158 | -1183.040230 | -1183.040465 |
|          | imine-one(I)  | -1183.010818 |              |              |              |
|          | imine-one(II) | -1183.006260 |              |              |              |
| <b>3</b> | amine-one     | -1222.363286 | -1222.375007 | -1222.380212 | -1222.380492 |
|          | imine-ol      | -1222.351833 | -1222.361007 | -1222.365369 | -1222.365652 |
|          | imine-one(I)  | -1222.333982 |              |              |              |
|          | imine-one(II) | -1222.328915 |              |              |              |
| <b>4</b> | amine-one     | -1183.037238 | -1183.049628 | -1183.054999 | -1183.055282 |
|          | imine-ol      | -1183.025276 | -1183.034838 | -1183.039223 | -1183.039486 |
|          | imine-one(I)  | -1183.009405 |              |              |              |
|          | imine-one(II) | -1183.001346 |              |              |              |
| <b>5</b> | amine-one     | -1069.905345 | -1069.915408 | -1069.919836 | -1069.920061 |
|          | imine-ol      | -1069.893926 | -1069.901481 | -1069.905124 | -1069.905283 |
|          | imine-one(I)  | -1069.877500 |              |              |              |
|          | imine-one(II) | -1069.874919 |              |              |              |
| <b>6</b> | amine-one     | -1109.230356 | -1109.241267 | -1109.246099 | -1109.246358 |
|          | imine-ol      | -1109.218448 | -1109.226639 | -1109.230521 | -1109.230697 |
|          | imine-one(I)  | -1109.200782 |              |              |              |
|          | imine-one(II) | -1109.196291 |              |              |              |
| <b>7</b> | amine-one     | -1069.903733 | -1069.915484 | -1069.920601 | -1069.920867 |
|          | imine-ol      | -1069.891051 | -1069.899730 | -1069.903863 | -1069.904077 |
|          | imine-one(I)  | -1069.871914 |              |              |              |
|          | imine-one(II) | -1069.866619 |              |              |              |
| <b>8</b> | amine-one     | -2023.008583 | -2023.025261 | -2023.032621 | -2023.033190 |
|          | imine-ol      | -2022.987531 | -2022.999320 | -2023.005067 | -2023.005368 |
|          | imine-one(I)  | -2022.954805 |              |              |              |
|          | imine-one(II) | -2022.939258 |              |              |              |
| <b>9</b> | amine-one     | -1796.739780 | -1796.755530 | -1796.762846 | -1796.763327 |
|          | imine-ol      | -1796.719701 | -1796.729684 | -1796.734786 | -1796.735087 |
|          | imine-one(I)  | -1796.683142 |              |              |              |
|          | imine-one(II) | -1796.672512 |              |              |              |

<sup>a</sup> Only the amine-one and imine-ol tautomeric forms are studied in chloroform, DMSO, and water.



## Atomic coordinates for the amine-one and imine-ol tautomeric forms presented in Figure 1

### Structure 1a

|   |              |              |              |
|---|--------------|--------------|--------------|
| C | -1.083994000 | 2.166411000  | -0.152974000 |
| C | -0.162979000 | 1.051485000  | -0.147007000 |
| C | -1.014062000 | -0.133537000 | -0.085918000 |
| N | -2.306908000 | 0.363832000  | -0.061787000 |
| N | -2.320743000 | 1.754947000  | -0.101415000 |
| C | -3.536741000 | -0.336707000 | -0.001556000 |
| C | -3.572258000 | -1.738044000 | 0.032879000  |
| C | -4.735415000 | 0.389456000  | 0.023526000  |
| C | -4.801210000 | -2.391221000 | 0.092137000  |
| H | -2.649358000 | -2.296983000 | 0.012807000  |
| C | -5.951554000 | -0.282725000 | 0.082624000  |
| H | -4.697931000 | 1.468685000  | -0.004070000 |
| C | -5.996020000 | -1.675729000 | 0.117581000  |
| H | -4.816964000 | -3.475354000 | 0.118065000  |
| H | -6.871391000 | 0.291589000  | 0.101250000  |
| H | -6.946765000 | -2.194290000 | 0.163487000  |
| O | -0.669857000 | -1.329083000 | -0.060160000 |
| H | 1.101095000  | -1.045958000 | -0.155116000 |
| C | -0.828959000 | 3.641850000  | -0.204515000 |
| H | -0.223966000 | 3.980016000  | 0.641905000  |
| H | -0.312931000 | 3.932645000  | -1.124636000 |
| H | -1.786813000 | 4.161856000  | -0.171815000 |
| C | 1.224852000  | 0.955723000  | -0.184938000 |
| C | 2.152639000  | 2.133797000  | -0.248721000 |
| H | 2.852361000  | 2.016296000  | -1.079961000 |
| H | 1.612222000  | 3.065604000  | -0.372479000 |
| H | 2.747306000  | 2.188777000  | 0.668011000  |
| N | 1.783759000  | -0.272969000 | -0.156225000 |
| C | 3.184602000  | -0.559589000 | -0.206616000 |
| C | 3.959107000  | -0.463714000 | 0.966989000  |
| C | 3.764972000  | -0.988513000 | -1.400008000 |
| C | 5.325123000  | -0.775315000 | 0.888436000  |
| C | 5.118554000  | -1.304927000 | -1.462467000 |
| H | 3.136276000  | -1.069094000 | -2.279729000 |
| C | 5.894909000  | -1.188486000 | -0.309208000 |
| H | 5.936070000  | -0.697884000 | 1.782072000  |
| H | 5.559556000  | -1.635721000 | -2.394599000 |
| H | 6.951678000  | -1.428857000 | -0.339162000 |
| N | 3.389540000  | -0.015938000 | 2.157604000  |
| H | 2.397603000  | -0.187076000 | 2.251747000  |
| H | 3.901883000  | -0.251982000 | 2.994803000  |

**Structure 1b**

|   |              |              |              |
|---|--------------|--------------|--------------|
| C | -1.121672000 | 2.262579000  | 0.127324000  |
| C | -0.172327000 | 1.193002000  | 0.037054000  |
| C | -0.971964000 | 0.045397000  | -0.068169000 |
| N | -2.270124000 | 0.431082000  | -0.043121000 |
| N | -2.358164000 | 1.808090000  | 0.081886000  |
| C | -3.460318000 | -0.347070000 | -0.091240000 |
| C | -3.441075000 | -1.674431000 | -0.532482000 |
| C | -4.665399000 | 0.245719000  | 0.300151000  |
| C | -4.629763000 | -2.400086000 | -0.568363000 |
| H | -2.514233000 | -2.134269000 | -0.840483000 |
| C | -5.842821000 | -0.492819000 | 0.252460000  |
| H | -4.662786000 | 1.275229000  | 0.628277000  |
| C | -5.833712000 | -1.818808000 | -0.178443000 |
| H | -4.607777000 | -3.428574000 | -0.910599000 |
| H | -6.772728000 | -0.026090000 | 0.557312000  |
| H | -6.753916000 | -2.390422000 | -0.211743000 |
| O | -0.557654000 | -1.205279000 | -0.169442000 |
| H | 0.455854000  | -1.104054000 | -0.155401000 |
| C | -0.904625000 | 3.738898000  | 0.254081000  |
| H | -0.398554000 | 3.993411000  | 1.189915000  |
| H | -0.298973000 | 4.130887000  | -0.567175000 |
| H | -1.872192000 | 4.241265000  | 0.240933000  |
| C | 1.272328000  | 1.106818000  | 0.020577000  |
| C | 2.096613000  | 2.368523000  | 0.088323000  |
| H | 2.014207000  | 2.934932000  | -0.844119000 |
| H | 1.729448000  | 3.010851000  | 0.890459000  |
| H | 3.147199000  | 2.144439000  | 0.262630000  |
| N | 1.778404000  | -0.093288000 | -0.039264000 |
| C | 3.161463000  | -0.358286000 | -0.170922000 |
| C | 3.788247000  | -1.136386000 | 0.828896000  |
| C | 3.887826000  | 0.022013000  | -1.302817000 |
| C | 5.133656000  | -1.490540000 | 0.663595000  |
| C | 5.224021000  | -0.339164000 | -1.457459000 |
| H | 3.381707000  | 0.586097000  | -2.078653000 |
| C | 5.844122000  | -1.097982000 | -0.465824000 |
| H | 5.622053000  | -2.076314000 | 1.436095000  |
| H | 5.768361000  | -0.040365000 | -2.345274000 |
| H | 6.882780000  | -1.390131000 | -0.571450000 |
| N | 3.087200000  | -1.476840000 | 1.984023000  |
| H | 2.081279000  | -1.430437000 | 1.902767000  |
| H | 3.410689000  | -2.301801000 | 2.466922000  |

**Structure 2a**

|   |              |              |              |
|---|--------------|--------------|--------------|
| C | -1.309400000 | 1.872051000  | 0.157898000  |
| C | -0.588211000 | 0.631772000  | -0.026129000 |
| C | -1.623445000 | -0.394133000 | -0.115194000 |
| N | -2.815195000 | 0.302775000  | -0.023098000 |
| N | -2.597823000 | 1.667640000  | 0.157440000  |

|   |              |              |              |
|---|--------------|--------------|--------------|
| C | -4.144385000 | -0.185964000 | -0.051120000 |
| C | -4.411974000 | -1.546921000 | -0.256935000 |
| C | -5.205882000 | 0.712171000  | 0.125383000  |
| C | -5.732505000 | -1.989521000 | -0.282449000 |
| H | -3.594533000 | -2.238446000 | -0.391971000 |
| C | -6.517006000 | 0.249042000  | 0.096015000  |
| H | -4.989332000 | 1.758917000  | 0.281363000  |
| C | -6.792099000 | -1.102503000 | -0.107151000 |
| H | -5.928186000 | -3.044179000 | -0.442661000 |
| H | -7.328944000 | 0.954766000  | 0.233763000  |
| H | -7.815959000 | -1.457688000 | -0.129073000 |
| O | -1.477269000 | -1.625285000 | -0.231505000 |
| H | 0.310942000  | -1.629862000 | -0.177528000 |
| C | -0.800796000 | 3.263853000  | 0.369855000  |
| H | -0.064102000 | 3.302010000  | 1.176135000  |
| H | -0.318874000 | 3.661472000  | -0.526605000 |
| H | -1.642509000 | 3.908011000  | 0.626340000  |
| C | 0.765117000  | 0.310592000  | -0.054679000 |
| N | 1.120162000  | -0.990520000 | -0.118894000 |
| C | 2.440463000  | -1.519643000 | -0.271641000 |
| C | 3.007774000  | -2.229494000 | 0.804842000  |
| C | 3.132449000  | -1.390266000 | -1.474708000 |
| C | 4.281669000  | -2.792099000 | 0.631450000  |
| C | 4.398571000  | -1.944455000 | -1.630749000 |
| H | 2.661074000  | -0.853960000 | -2.289815000 |
| C | 4.966173000  | -2.648833000 | -0.568488000 |
| H | 4.734181000  | -3.336696000 | 1.453903000  |
| H | 4.929041000  | -1.837319000 | -2.568791000 |
| H | 5.949248000  | -3.093438000 | -0.675327000 |
| N | 2.350949000  | -2.305135000 | 2.030604000  |
| H | 1.350015000  | -2.173992000 | 2.007262000  |
| H | 2.632037000  | -3.065902000 | 2.631125000  |
| C | 1.845309000  | 1.335497000  | 0.002599000  |
| C | 2.696715000  | 1.399827000  | 1.111548000  |
| C | 2.026349000  | 2.228880000  | -1.057373000 |
| C | 3.703391000  | 2.360167000  | 1.163641000  |
| H | 2.568398000  | 0.701775000  | 1.931060000  |
| C | 3.044432000  | 3.178272000  | -1.008292000 |
| H | 1.375586000  | 2.172509000  | -1.922561000 |
| C | 3.880474000  | 3.249419000  | 0.104359000  |
| H | 4.352456000  | 2.410453000  | 2.030369000  |
| H | 3.182900000  | 3.861942000  | -1.838140000 |
| H | 4.668971000  | 3.992306000  | 0.144734000  |

### Structure 2b

|   |              |              |              |
|---|--------------|--------------|--------------|
| C | -1.276622000 | 1.920046000  | 0.245944000  |
| C | -0.563139000 | 0.693289000  | 0.033145000  |
| C | -1.579988000 | -0.264901000 | -0.107681000 |
| N | -2.771893000 | 0.368727000  | -0.018308000 |
| N | -2.579177000 | 1.722122000  | 0.214719000  |

|   |              |              |              |
|---|--------------|--------------|--------------|
| C | -4.093772000 | -0.153485000 | -0.075553000 |
| C | -4.350636000 | -1.412353000 | -0.628628000 |
| C | -5.145227000 | 0.624597000  | 0.419936000  |
| C | -5.659854000 | -1.886533000 | -0.670096000 |
| H | -3.542600000 | -2.013425000 | -1.017878000 |
| C | -6.446577000 | 0.137182000  | 0.364484000  |
| H | -4.928761000 | 1.599422000  | 0.832853000  |
| C | -6.712713000 | -1.119976000 | -0.176625000 |
| H | -5.852299000 | -2.863464000 | -1.098975000 |
| H | -7.256482000 | 0.746071000  | 0.750214000  |
| H | -7.728555000 | -1.495742000 | -0.215373000 |
| O | -1.430507000 | -1.567494000 | -0.273660000 |
| H | -0.423717000 | -1.686833000 | -0.212777000 |
| C | -0.765613000 | 3.302076000  | 0.510149000  |
| H | -0.021625000 | 3.305601000  | 1.310045000  |
| H | -0.290842000 | 3.734161000  | -0.373779000 |
| H | -1.602591000 | 3.938203000  | 0.799962000  |
| C | 0.830703000  | 0.310183000  | -0.006221000 |
| N | 1.085919000  | -0.969678000 | -0.022106000 |
| C | 2.382479000  | -1.516115000 | -0.185580000 |
| C | 2.866674000  | -2.373924000 | 0.826264000  |
| C | 3.132663000  | -1.330238000 | -1.349137000 |
| C | 4.101267000  | -3.008253000 | 0.641572000  |
| C | 4.357337000  | -1.969389000 | -1.523227000 |
| H | 2.735791000  | -0.689690000 | -2.127946000 |
| C | 4.839243000  | -2.809840000 | -0.520763000 |
| H | 4.482023000  | -3.658240000 | 1.423329000  |
| H | 4.923380000  | -1.817436000 | -2.434487000 |
| H | 5.789990000  | -3.316332000 | -0.642985000 |
| N | 2.150136000  | -2.511009000 | 2.017326000  |
| H | 1.167600000  | -2.284313000 | 1.943392000  |
| H | 2.317155000  | -3.366998000 | 2.526134000  |
| C | 1.898398000  | 1.358744000  | -0.020493000 |
| C | 2.819155000  | 1.434460000  | 1.030330000  |
| C | 1.994823000  | 2.262075000  | -1.083492000 |
| C | 3.814647000  | 2.407913000  | 1.020217000  |
| H | 2.753935000  | 0.731292000  | 1.852846000  |
| C | 3.003511000  | 3.222602000  | -1.100772000 |
| H | 1.287436000  | 2.203495000  | -1.903531000 |
| C | 3.911420000  | 3.301172000  | -0.046010000 |
| H | 4.519138000  | 2.464012000  | 1.842257000  |
| H | 3.078818000  | 3.909878000  | -1.935973000 |
| H | 4.692312000  | 4.053150000  | -0.056041000 |

### Structure 3a

|   |              |              |              |
|---|--------------|--------------|--------------|
| C | -1.643018000 | 1.932169000  | 0.240320000  |
| C | -0.808378000 | 0.778988000  | -0.016935000 |
| C | -1.742778000 | -0.335755000 | -0.151149000 |
| N | -2.994859000 | 0.238652000  | -0.016471000 |
| N | -2.906444000 | 1.605746000  | 0.235774000  |

|   |              |              |              |
|---|--------------|--------------|--------------|
| C | -4.271242000 | -0.373256000 | -0.060393000 |
| C | -4.410851000 | -1.740826000 | -0.337264000 |
| C | -5.411338000 | 0.408377000  | 0.172162000  |
| C | -5.683464000 | -2.305831000 | -0.376382000 |
| H | -3.532912000 | -2.342721000 | -0.514964000 |
| C | -6.672676000 | -0.175909000 | 0.127884000  |
| H | -5.293419000 | 1.461337000  | 0.382598000  |
| C | -6.820491000 | -1.534971000 | -0.145564000 |
| H | -5.779835000 | -3.364496000 | -0.591463000 |
| H | -7.546304000 | 0.440603000  | 0.309547000  |
| H | -7.806081000 | -1.984949000 | -0.178650000 |
| O | -1.483095000 | -1.540277000 | -0.326847000 |
| H | 0.290541000  | -1.372425000 | -0.221454000 |
| C | -1.272456000 | 3.354027000  | 0.528139000  |
| H | -0.530654000 | 3.420884000  | 1.327761000  |
| H | -0.848424000 | 3.850163000  | -0.348138000 |
| H | -2.170838000 | 3.893097000  | 0.830761000  |
| C | 0.571516000  | 0.591079000  | -0.068919000 |
| N | 1.042335000  | -0.666790000 | -0.185688000 |
| C | 2.381838000  | -1.107965000 | -0.399310000 |
| C | 2.875092000  | -2.148903000 | 0.405222000  |
| C | 3.148079000  | -0.556950000 | -1.430021000 |
| C | 4.172516000  | -2.638625000 | 0.140021000  |
| C | 4.433615000  | -1.034891000 | -1.653429000 |
| H | 2.732588000  | 0.220506000  | -2.055639000 |
| C | 4.944769000  | -2.068638000 | -0.880261000 |
| H | 5.033800000  | -0.612704000 | -2.451221000 |
| H | 5.944182000  | -2.447767000 | -1.067884000 |
| C | 1.538463000  | 1.719530000  | 0.049879000  |
| C | 2.385683000  | 1.801455000  | 1.160381000  |
| C | 1.609511000  | 2.702885000  | -0.941353000 |
| C | 3.282258000  | 2.859395000  | 1.281301000  |
| H | 2.337868000  | 1.040247000  | 1.930383000  |
| C | 2.518125000  | 3.752029000  | -0.825718000 |
| H | 0.960439000  | 2.637503000  | -1.807242000 |
| C | 3.352936000  | 3.834669000  | 0.287342000  |
| H | 3.928113000  | 2.919726000  | 2.149766000  |
| H | 2.572551000  | 4.504856000  | -1.603901000 |
| H | 4.056198000  | 4.654491000  | 0.379582000  |
| N | 4.712932000  | -3.647515000 | 0.942743000  |
| H | 4.058387000  | -4.304890000 | 1.339446000  |
| H | 5.527431000  | -4.106630000 | 0.562607000  |
| C | 2.078654000  | -2.742511000 | 1.540373000  |
| H | 1.192089000  | -2.153275000 | 1.769316000  |
| H | 1.736589000  | -3.759986000 | 1.311801000  |
| H | 2.686539000  | -2.799431000 | 2.449302000  |

**Structure 3b**

|   |             |             |              |
|---|-------------|-------------|--------------|
| C | 1.621000000 | 1.945287000 | -0.315184000 |
| C | 0.810131000 | 0.799321000 | -0.019736000 |

|   |              |              |              |
|---|--------------|--------------|--------------|
| C | 1.743371000  | -0.236355000 | 0.151672000  |
| N | 2.983641000  | 0.284736000  | 0.000082000  |
| N | 2.902141000  | 1.636178000  | -0.300746000 |
| C | 4.256789000  | -0.346087000 | 0.058215000  |
| C | 4.413049000  | -1.610449000 | 0.636540000  |
| C | 5.365486000  | 0.329190000  | -0.463383000 |
| C | 5.678322000  | -2.191859000 | 0.677901000  |
| H | 3.561290000  | -2.133443000 | 1.044468000  |
| C | 6.621649000  | -0.265019000 | -0.408250000 |
| H | 5.227596000  | 1.309321000  | -0.896728000 |
| C | 6.787101000  | -1.527972000 | 0.158839000  |
| H | 5.791941000  | -3.172378000 | 1.126378000  |
| H | 7.475715000  | 0.265120000  | -0.814570000 |
| H | 7.768082000  | -1.987170000 | 0.197413000  |
| O | 1.482352000  | -1.508103000 | 0.389530000  |
| H | 0.462531000  | -1.534930000 | 0.354867000  |
| C | 1.226198000  | 3.352091000  | -0.641219000 |
| H | 0.469012000  | 3.381837000  | -1.428136000 |
| H | 0.809099000  | 3.867242000  | 0.227206000  |
| H | 2.109136000  | 3.897239000  | -0.976600000 |
| C | -0.610481000 | 0.536576000  | 0.063633000  |
| N | -0.964393000 | -0.712283000 | 0.179932000  |
| C | -2.294920000 | -1.151317000 | 0.392898000  |
| C | -2.855545000 | -2.075468000 | -0.507712000 |
| C | -2.994332000 | -0.755095000 | 1.540458000  |
| C | -4.145804000 | -2.578591000 | -0.242164000 |
| C | -4.263266000 | -1.266508000 | 1.785049000  |
| H | -2.533479000 | -0.066451000 | 2.236418000  |
| C | -4.842200000 | -2.169146000 | 0.902699000  |
| H | -4.803732000 | -0.963469000 | 2.674946000  |
| H | -5.834413000 | -2.564426000 | 1.095468000  |
| C | -1.586078000 | 1.671358000  | 0.000159000  |
| C | -2.492441000 | 1.763586000  | -1.060995000 |
| C | -1.606396000 | 2.645705000  | 1.003179000  |
| C | -3.400089000 | 2.818140000  | -1.120226000 |
| H | -2.485733000 | 1.010045000  | -1.839799000 |
| C | -2.526807000 | 3.689656000  | 0.952254000  |
| H | -0.909241000 | 2.577419000  | 1.831174000  |
| C | -3.422243000 | 3.780884000  | -0.112322000 |
| H | -4.094109000 | 2.883831000  | -1.950463000 |
| H | -2.543564000 | 4.432064000  | 1.742309000  |
| H | -4.134648000 | 4.596954000  | -0.155250000 |
| N | -4.757837000 | -3.444343000 | -1.156742000 |
| H | -4.139214000 | -4.023238000 | -1.704883000 |
| H | -5.538697000 | -3.968496000 | -0.789917000 |
| C | -2.125360000 | -2.519272000 | -1.750408000 |
| H | -1.160100000 | -2.024589000 | -1.841509000 |
| H | -1.936565000 | -3.600865000 | -1.745383000 |
| H | -2.707395000 | -2.298735000 | -2.652714000 |

**Structure 4a**

|   |              |              |              |
|---|--------------|--------------|--------------|
| C | 1.606735000  | 1.843336000  | 0.094276000  |
| C | 0.783858000  | 0.657896000  | 0.002774000  |
| C | 1.731259000  | -0.452598000 | -0.036994000 |
| N | 2.977851000  | 0.149665000  | -0.011270000 |
| N | 2.875095000  | 1.535307000  | 0.083115000  |
| C | 4.261835000  | -0.446885000 | -0.032562000 |
| C | 4.414324000  | -1.836723000 | -0.140468000 |
| C | 5.396578000  | 0.371847000  | 0.051513000  |
| C | 5.694096000  | -2.386285000 | -0.162012000 |
| H | 3.540582000  | -2.466973000 | -0.203762000 |
| C | 6.665204000  | -0.197673000 | 0.027938000  |
| H | 5.268639000  | 1.441380000  | 0.133078000  |
| C | 6.825829000  | -1.578477000 | -0.078438000 |
| H | 5.800257000  | -3.462424000 | -0.245665000 |
| H | 7.534445000  | 0.447658000  | 0.093691000  |
| H | 7.817053000  | -2.016827000 | -0.096160000 |
| O | 1.485933000  | -1.672423000 | -0.069780000 |
| H | -0.284534000 | -1.513174000 | 0.075898000  |
| C | 1.221562000  | 3.284449000  | 0.224288000  |
| H | 0.752259000  | 3.664603000  | -0.686386000 |
| H | 0.512826000  | 3.438195000  | 1.041773000  |
| H | 2.121385000  | 3.868593000  | 0.420197000  |
| C | -0.594715000 | 0.449155000  | 0.021057000  |
| N | -1.048079000 | -0.819132000 | 0.050207000  |
| C | -2.375928000 | -1.320648000 | -0.011613000 |
| C | -2.702238000 | -2.410394000 | 0.802642000  |
| C | -3.343093000 | -0.831779000 | -0.894358000 |
| C | -3.964252000 | -2.986227000 | 0.751881000  |
| C | -4.610385000 | -1.398698000 | -0.936695000 |
| H | -3.107512000 | -0.013565000 | -1.561144000 |
| C | -4.945869000 | -2.485357000 | -0.115887000 |
| H | -5.347554000 | -1.000247000 | -1.626201000 |
| C | -1.571050000 | 1.575902000  | 0.051569000  |
| C | -1.714023000 | 2.424006000  | -1.050764000 |
| C | -2.353458000 | 1.792321000  | 1.191074000  |
| C | -2.629995000 | 3.473029000  | -1.015456000 |
| H | -1.113161000 | 2.254746000  | -1.937232000 |
| C | -3.257842000 | 2.850088000  | 1.229276000  |
| H | -2.249243000 | 1.135313000  | 2.046765000  |
| C | -3.400474000 | 3.690293000  | 0.125568000  |
| H | -2.738879000 | 4.121541000  | -1.877381000 |
| H | -3.853035000 | 3.016055000  | 2.119907000  |
| H | -4.108825000 | 4.510400000  | 0.155023000  |
| H | -1.957158000 | -2.807237000 | 1.483427000  |
| H | -4.194464000 | -3.827421000 | 1.397388000  |
| N | -6.235068000 | -3.018946000 | -0.124139000 |
| H | -6.774742000 | -2.855376000 | -0.961124000 |
| H | -6.322153000 | -3.967587000 | 0.209096000  |

**Structure 4b**

|   |              |              |              |
|---|--------------|--------------|--------------|
| C | -1.592879000 | 1.886003000  | -0.122727000 |
| C | -0.779325000 | 0.708651000  | -0.022272000 |
| C | -1.713382000 | -0.339177000 | 0.043452000  |
| N | -2.955277000 | 0.201114000  | 0.015982000  |
| N | -2.874962000 | 1.580971000  | -0.097357000 |
| C | -4.229895000 | -0.427993000 | 0.039830000  |
| C | -4.370095000 | -1.768568000 | 0.415840000  |
| C | -5.357269000 | 0.324218000  | -0.308207000 |
| C | -5.637776000 | -2.346043000 | 0.430273000  |
| H | -3.504015000 | -2.352266000 | 0.688739000  |
| C | -6.615102000 | -0.268407000 | -0.283055000 |
| H | -5.231494000 | 1.360564000  | -0.586666000 |
| C | -6.764894000 | -1.605437000 | 0.082985000  |
| H | -5.738307000 | -3.385644000 | 0.721236000  |
| H | -7.483146000 | 0.321968000  | -0.554363000 |
| H | -7.747402000 | -2.062743000 | 0.098966000  |
| O | -1.449624000 | -1.630107000 | 0.093263000  |
| H | -0.426607000 | -1.645177000 | 0.015110000  |
| C | -1.202278000 | 3.324373000  | -0.264788000 |
| H | -0.740470000 | 3.710784000  | 0.646916000  |
| H | -0.483569000 | 3.465120000  | -1.075389000 |
| H | -2.095900000 | 3.912578000  | -0.476335000 |
| C | 0.640913000  | 0.432562000  | -0.037469000 |
| N | 0.983000000  | -0.825873000 | -0.086349000 |
| C | 2.301922000  | -1.326315000 | -0.028429000 |
| C | 2.641782000  | -2.372223000 | -0.897608000 |
| C | 3.259643000  | -0.917201000 | 0.909844000  |
| C | 3.900826000  | -2.956366000 | -0.866104000 |
| C | 4.514539000  | -1.512022000 | 0.955779000  |
| H | 3.018207000  | -0.140854000 | 1.624058000  |
| C | 4.862651000  | -2.535706000 | 0.063680000  |
| H | 5.235126000  | -1.178692000 | 1.696151000  |
| C | 1.618664000  | 1.567935000  | -0.026744000 |
| C | 1.723453000  | 2.409379000  | 1.085428000  |
| C | 2.438131000  | 1.797459000  | -1.136888000 |
| C | 2.641485000  | 3.457213000  | 1.092395000  |
| H | 1.092260000  | 2.235523000  | 1.950246000  |
| C | 3.344028000  | 2.855190000  | -1.135120000 |
| H | 2.365308000  | 1.145956000  | -2.000002000 |
| C | 3.450922000  | 3.684738000  | -0.019597000 |
| H | 2.722386000  | 4.096901000  | 1.964176000  |
| H | 3.970015000  | 3.028035000  | -2.003232000 |
| H | 4.160888000  | 4.504067000  | -0.017026000 |
| H | 1.902542000  | -2.719573000 | -1.610782000 |
| H | 4.140549000  | -3.751690000 | -1.564817000 |
| N | 6.148011000  | -3.087591000 | 0.067992000  |
| H | 6.654106000  | -3.003744000 | 0.937476000  |
| H | 6.224712000  | -4.014183000 | -0.325428000 |



**Structure 5a**

|   |              |              |              |
|---|--------------|--------------|--------------|
| C | -1.247973000 | 2.027487000  | -0.484785000 |
| C | -0.336641000 | 0.911532000  | -0.351897000 |
| C | -1.202110000 | -0.250175000 | -0.169399000 |
| N | -2.488669000 | 0.257670000  | -0.199005000 |
| N | -2.489460000 | 1.634410000  | -0.398535000 |
| C | -3.725416000 | -0.420038000 | -0.062043000 |
| C | -3.776639000 | -1.811915000 | 0.099367000  |
| C | -4.915220000 | 0.320415000  | -0.089845000 |
| C | -5.012240000 | -2.441628000 | 0.230844000  |
| H | -2.860591000 | -2.381893000 | 0.120186000  |
| C | -6.138222000 | -0.328324000 | 0.042994000  |
| H | -4.865520000 | 1.392056000  | -0.216321000 |
| C | -6.198281000 | -1.711777000 | 0.204556000  |
| H | -5.040291000 | -3.518738000 | 0.354599000  |
| H | -7.051090000 | 0.256805000  | 0.019533000  |
| H | -7.154323000 | -2.212084000 | 0.307504000  |
| O | -0.871012000 | -1.441147000 | -0.007643000 |
| H | 0.860753000  | -1.183626000 | -0.180211000 |
| C | -0.989469000 | 3.482671000  | -0.732103000 |
| H | -0.409904000 | 3.939402000  | 0.074127000  |
| H | -0.446835000 | 3.643156000  | -1.668716000 |
| H | -1.948405000 | 3.997293000  | -0.800754000 |
| C | 1.053798000  | 0.795087000  | -0.370980000 |
| N | 1.578514000  | -0.444578000 | -0.266792000 |
| C | 2.948631000  | -0.832751000 | -0.379081000 |
| C | 3.625459000  | -0.741540000 | -1.595731000 |
| C | 3.586045000  | -1.392722000 | 0.747638000  |
| C | 4.944606000  | -1.166590000 | -1.714399000 |
| C | 4.914114000  | -1.828044000 | 0.611338000  |
| C | 5.583148000  | -1.711872000 | -0.599774000 |
| H | 5.419245000  | -2.253554000 | 1.472426000  |
| H | 3.095733000  | -0.348437000 | -2.456159000 |
| H | 5.459317000  | -1.090034000 | -2.664159000 |
| C | 1.993631000  | 1.972596000  | -0.447297000 |
| H | 1.442160000  | 2.851605000  | -0.772438000 |
| H | 2.751372000  | 1.773169000  | -1.208106000 |
| C | 2.715703000  | 2.278219000  | 0.889425000  |
| H | 3.450858000  | 3.063195000  | 0.684334000  |
| C | 1.794042000  | 2.726979000  | 2.026033000  |
| H | 1.271290000  | 3.655205000  | 1.777089000  |
| H | 1.038602000  | 1.972477000  | 2.260026000  |
| H | 2.372007000  | 2.909139000  | 2.935686000  |
| H | 3.285381000  | 1.400404000  | 1.203136000  |
| H | 6.608331000  | -2.056376000 | -0.675459000 |
| N | 2.937740000  | -1.450173000 | 1.975052000  |
| H | 1.929780000  | -1.399092000 | 1.957564000  |
| H | 3.291539000  | -2.127846000 | 2.633035000  |

**Structure 5b**

|   |              |              |              |
|---|--------------|--------------|--------------|
| C | -1.240762000 | 2.053101000  | -0.525109000 |
| C | -0.335555000 | 0.948932000  | -0.369617000 |
| C | -1.189986000 | -0.153522000 | -0.183549000 |
| N | -2.468826000 | 0.289029000  | -0.221942000 |
| N | -2.494326000 | 1.658138000  | -0.433040000 |
| C | -3.692420000 | -0.418229000 | -0.057592000 |
| C | -3.739361000 | -1.814744000 | -0.129861000 |
| C | -4.863918000 | 0.312693000  | 0.167651000  |
| C | -4.959619000 | -2.466984000 | 0.032742000  |
| H | -2.839040000 | -2.382874000 | -0.307782000 |
| C | -6.073371000 | -0.355956000 | 0.322991000  |
| H | -4.810727000 | 1.390981000  | 0.210965000  |
| C | -6.130263000 | -1.747577000 | 0.259341000  |
| H | -4.988493000 | -3.549292000 | -0.023936000 |
| H | -6.976456000 | 0.218232000  | 0.496992000  |
| H | -7.075252000 | -2.263713000 | 0.382761000  |
| O | -0.830970000 | -1.407945000 | 0.001715000  |
| H | 0.195656000  | -1.348439000 | -0.052343000 |
| C | -0.982941000 | 3.505064000  | -0.789387000 |
| H | -0.385056000 | 3.963676000  | 0.001465000  |
| H | -0.457199000 | 3.654865000  | -1.736821000 |
| H | -1.939916000 | 4.024843000  | -0.844774000 |
| C | 1.100697000  | 0.772636000  | -0.389237000 |
| N | 1.525399000  | -0.451547000 | -0.214948000 |
| C | 2.881076000  | -0.848977000 | -0.321044000 |
| C | 3.546430000  | -0.870760000 | -1.549903000 |
| C | 3.525095000  | -1.363943000 | 0.825802000  |
| C | 4.844273000  | -1.364347000 | -1.658756000 |
| C | 4.830718000  | -1.856651000 | 0.704519000  |
| C | 5.485380000  | -1.855884000 | -0.522657000 |
| H | 5.332197000  | -2.240846000 | 1.587432000  |
| H | 3.021085000  | -0.517820000 | -2.430666000 |
| H | 5.341391000  | -1.376201000 | -2.621401000 |
| C | 2.037119000  | 1.953135000  | -0.566412000 |
| H | 1.481051000  | 2.812702000  | -0.938284000 |
| H | 2.777009000  | 1.699338000  | -1.327828000 |
| C | 2.789509000  | 2.338706000  | 0.730149000  |
| H | 3.524783000  | 3.105477000  | 0.464469000  |
| C | 1.897128000  | 2.860207000  | 1.859559000  |
| H | 1.374772000  | 3.776825000  | 1.569281000  |
| H | 1.143545000  | 2.125392000  | 2.155299000  |
| H | 2.496101000  | 3.090287000  | 2.744520000  |
| H | 3.359446000  | 1.476017000  | 1.082725000  |
| H | 6.494059000  | -2.247272000 | -0.590613000 |
| N | 2.884495000  | -1.307957000 | 2.064832000  |
| H | 1.877179000  | -1.239910000 | 2.017000000  |
| H | 3.199058000  | -1.983741000 | 2.745719000  |

**Structure 6a**

|   |              |              |              |
|---|--------------|--------------|--------------|
| C | -1.641581000 | 2.098143000  | -0.309225000 |
| C | -0.652996000 | 1.041647000  | -0.303490000 |
| C | -1.432109000 | -0.190003000 | -0.209236000 |
| N | -2.751481000 | 0.227601000  | -0.163479000 |
| N | -2.850952000 | 1.612970000  | -0.232456000 |
| C | -3.934526000 | -0.544825000 | -0.063985000 |
| C | -3.886103000 | -1.945764000 | -0.026664000 |
| C | -5.172997000 | 0.109004000  | -0.002650000 |
| C | -5.071794000 | -2.670307000 | 0.071560000  |
| H | -2.932656000 | -2.448923000 | -0.074032000 |
| C | -6.344772000 | -0.633723000 | 0.094979000  |
| H | -5.200252000 | 1.188450000  | -0.033544000 |
| C | -6.305608000 | -2.026824000 | 0.133271000  |
| H | -5.022511000 | -3.753423000 | 0.099257000  |
| H | -7.295999000 | -0.114743000 | 0.141402000  |
| H | -7.222091000 | -2.600614000 | 0.209387000  |
| O | -1.018229000 | -1.363954000 | -0.164571000 |
| H | 0.692111000  | -0.966137000 | -0.288294000 |
| C | -1.492582000 | 3.585441000  | -0.420423000 |
| H | -0.920925000 | 4.004688000  | 0.411725000  |
| H | -0.993181000 | 3.874076000  | -1.350337000 |
| H | -2.486932000 | 4.033108000  | -0.414062000 |
| C | 0.742099000  | 1.026103000  | -0.367748000 |
| N | 1.352294000  | -0.175764000 | -0.368462000 |
| C | 2.734933000  | -0.474587000 | -0.568502000 |
| C | 3.423151000  | -1.200228000 | 0.417157000  |
| C | 3.352232000  | -0.109668000 | -1.768798000 |
| C | 4.768977000  | -1.551527000 | 0.169495000  |
| C | 4.684915000  | -0.443680000 | -1.981505000 |
| C | 5.390695000  | -1.158051000 | -1.022793000 |
| C | 1.587176000  | 2.277532000  | -0.364040000 |
| H | 0.952019000  | 3.137098000  | -0.562409000 |
| H | 2.311903000  | 2.225106000  | -1.178335000 |
| C | 2.360073000  | 2.501066000  | 0.959221000  |
| H | 2.998255000  | 3.378838000  | 0.814262000  |
| C | 1.473941000  | 2.712578000  | 2.189458000  |
| H | 0.838600000  | 3.596220000  | 2.078739000  |
| H | 0.819640000  | 1.856426000  | 2.373121000  |
| H | 2.087353000  | 2.859390000  | 3.082346000  |
| H | 3.036990000  | 1.659656000  | 1.128239000  |
| H | 6.427567000  | -1.426822000 | -1.197118000 |
| C | 2.780663000  | -1.602177000 | 1.720484000  |
| H | 1.797070000  | -1.152444000 | 1.842640000  |
| H | 2.647090000  | -2.689360000 | 1.787479000  |
| H | 3.400655000  | -1.297047000 | 2.570224000  |
| N | 5.499872000  | -2.233856000 | 1.144223000  |
| H | 4.977033000  | -2.836752000 | 1.761250000  |
| H | 6.353523000  | -2.664582000 | 0.821397000  |
| H | 2.779864000  | 0.398020000  | -2.534566000 |
| H | 5.169864000  | -0.166142000 | -2.910382000 |

**Structure 6b**

|   |              |              |              |
|---|--------------|--------------|--------------|
| C | -1.626119000 | 2.112755000  | -0.377561000 |
| C | -0.650308000 | 1.060415000  | -0.346826000 |
| C | -1.427009000 | -0.106572000 | -0.226884000 |
| N | -2.732115000 | 0.254969000  | -0.184215000 |
| N | -2.849226000 | 1.632267000  | -0.278932000 |
| C | -3.903384000 | -0.539853000 | -0.043777000 |
| C | -3.859997000 | -1.931120000 | -0.188536000 |
| C | -5.117387000 | 0.098300000  | 0.234019000  |
| C | -5.032332000 | -2.670337000 | -0.046651000 |
| H | -2.927062000 | -2.428347000 | -0.405726000 |
| C | -6.277647000 | -0.656451000 | 0.368298000  |
| H | -5.134576000 | 1.173869000  | 0.334495000  |
| C | -6.244358000 | -2.043551000 | 0.231454000  |
| H | -4.990448000 | -3.747838000 | -0.159629000 |
| H | -7.213616000 | -0.153128000 | 0.583366000  |
| H | -7.151363000 | -2.627113000 | 0.338564000  |
| O | -0.982875000 | -1.344259000 | -0.159227000 |
| H | 0.038433000  | -1.210057000 | -0.236187000 |
| C | -1.468014000 | 3.595330000  | -0.526383000 |
| H | -0.874538000 | 4.026296000  | 0.283420000  |
| H | -0.983674000 | 3.856066000  | -1.471891000 |
| H | -2.456784000 | 4.054920000  | -0.511619000 |
| C | 0.794000000  | 0.977118000  | -0.421085000 |
| N | 1.292705000  | -0.227875000 | -0.379135000 |
| C | 2.663525000  | -0.540689000 | -0.553878000 |
| C | 3.380782000  | -1.133984000 | 0.500941000  |
| C | 3.257207000  | -0.365419000 | -1.811999000 |
| C | 4.717948000  | -1.522493000 | 0.273946000  |
| C | 4.576159000  | -0.755481000 | -2.014216000 |
| C | 5.308629000  | -1.325777000 | -0.981454000 |
| C | 1.648113000  | 2.229941000  | -0.498607000 |
| H | 1.025431000  | 3.081906000  | -0.768381000 |
| H | 2.379147000  | 2.103212000  | -1.299300000 |
| C | 2.414188000  | 2.539935000  | 0.809075000  |
| H | 3.060451000  | 3.401819000  | 0.612176000  |
| C | 1.526619000  | 2.836913000  | 2.020928000  |
| H | 0.900125000  | 3.718142000  | 1.853864000  |
| H | 0.864417000  | 1.999372000  | 2.256216000  |
| H | 2.138157000  | 3.033562000  | 2.905634000  |
| H | 3.082663000  | 1.705309000  | 1.034777000  |
| H | 6.338404000  | -1.628367000 | -1.141832000 |
| C | 2.763519000  | -1.351037000 | 1.859574000  |
| H | 1.739724000  | -0.983382000 | 1.893686000  |
| H | 2.734238000  | -2.416104000 | 2.124271000  |
| H | 3.334170000  | -0.839591000 | 2.643244000  |
| N | 5.476865000  | -2.051445000 | 1.323795000  |
| H | 4.965476000  | -2.540244000 | 2.043222000  |
| H | 6.306508000  | -2.552350000 | 1.041501000  |
| H | 2.671349000  | 0.046889000  | -2.624472000 |
| H | 5.033956000  | -0.623846000 | -2.988429000 |

**Structure 7a**

|   |              |              |              |
|---|--------------|--------------|--------------|
| C | -1.527541000 | 1.969067000  | -0.531831000 |
| C | -0.567462000 | 0.910797000  | -0.305529000 |
| C | -1.380535000 | -0.280655000 | -0.076524000 |
| N | -2.690277000 | 0.160070000  | -0.175845000 |
| N | -2.751135000 | 1.520111000  | -0.458230000 |
| C | -3.895610000 | -0.570081000 | -0.036177000 |
| C | -3.884141000 | -1.947488000 | 0.226893000  |
| C | -5.119240000 | 0.102009000  | -0.163842000 |
| C | -5.091107000 | -2.630466000 | 0.358155000  |
| H | -2.942157000 | -2.464658000 | 0.325447000  |
| C | -6.312716000 | -0.599220000 | -0.029277000 |
| H | -5.117979000 | 1.162951000  | -0.367085000 |
| C | -6.310284000 | -1.968608000 | 0.232517000  |
| H | -5.070159000 | -3.695631000 | 0.561495000  |
| H | -7.251972000 | -0.066377000 | -0.130551000 |
| H | -7.243544000 | -2.510093000 | 0.336523000  |
| O | -0.999884000 | -1.440919000 | 0.165889000  |
| H | 0.732324000  | -1.092842000 | 0.099375000  |
| C | -1.335812000 | 3.420045000  | -0.855478000 |
| H | -0.803780000 | 3.951646000  | -0.062127000 |
| H | -0.776014000 | 3.557253000  | -1.785748000 |
| H | -2.317597000 | 3.878738000  | -0.977569000 |
| C | 0.828110000  | 0.864589000  | -0.279519000 |
| N | 1.410145000  | -0.331555000 | -0.064498000 |
| C | 2.795674000  | -0.666713000 | -0.108401000 |
| C | 3.550101000  | -0.526669000 | -1.275945000 |
| C | 3.400423000  | -1.235479000 | 1.015686000  |
| C | 4.885857000  | -0.907740000 | -1.308213000 |
| C | 4.731135000  | -1.631842000 | 0.983852000  |
| H | 2.819134000  | -1.366078000 | 1.921528000  |
| C | 5.500984000  | -1.466883000 | -0.177778000 |
| H | 5.181862000  | -2.067183000 | 1.869673000  |
| H | 3.083512000  | -0.139147000 | -2.174054000 |
| H | 5.454905000  | -0.786802000 | -2.224236000 |
| N | 6.853342000  | -1.803642000 | -0.192870000 |
| H | 7.150085000  | -2.480585000 | 0.494095000  |
| H | 7.259338000  | -1.971537000 | -1.101294000 |
| C | 1.701980000  | 2.088728000  | -0.414966000 |
| H | 1.101971000  | 2.915566000  | -0.786490000 |
| H | 2.474726000  | 1.901013000  | -1.163155000 |
| C | 2.395399000  | 2.506574000  | 0.905500000  |
| H | 3.047044000  | 3.354902000  | 0.671618000  |
| C | 1.438659000  | 2.893452000  | 2.036084000  |
| H | 0.811133000  | 3.745251000  | 1.758014000  |
| H | 0.775237000  | 2.068370000  | 2.307861000  |
| H | 1.999455000  | 3.177113000  | 2.930581000  |
| H | 3.053770000  | 1.700090000  | 1.237868000  |

**Structure 7b**

|   |              |              |              |
|---|--------------|--------------|--------------|
| C | -1.533296000 | 2.004934000  | -0.555374000 |
| C | -0.570650000 | 0.963539000  | -0.335365000 |
| C | -1.363105000 | -0.178791000 | -0.116021000 |
| N | -2.665895000 | 0.187705000  | -0.196742000 |
| N | -2.764301000 | 1.542441000  | -0.471454000 |
| C | -3.851116000 | -0.581035000 | -0.032251000 |
| C | -3.806560000 | -1.976702000 | 0.064673000  |
| C | -5.080521000 | 0.085579000  | 0.023985000  |
| C | -4.993097000 | -2.689739000 | 0.221989000  |
| H | -2.862002000 | -2.496657000 | 0.020517000  |
| C | -6.254111000 | -0.644141000 | 0.178699000  |
| H | -5.098071000 | 1.162590000  | -0.058366000 |
| C | -6.220284000 | -2.034251000 | 0.280235000  |
| H | -4.949579000 | -3.770517000 | 0.296934000  |
| H | -7.201388000 | -0.118258000 | 0.221253000  |
| H | -7.137947000 | -2.597971000 | 0.401928000  |
| O | -0.931554000 | -1.396190000 | 0.131781000  |
| H | 0.098462000  | -1.267241000 | 0.098747000  |
| C | -1.352980000 | 3.457417000  | -0.876558000 |
| H | -0.813710000 | 3.986440000  | -0.086931000 |
| H | -0.801852000 | 3.598537000  | -1.810870000 |
| H | -2.336476000 | 3.915094000  | -0.987908000 |
| C | 0.873836000  | 0.868759000  | -0.307292000 |
| N | 1.354469000  | -0.327078000 | -0.098101000 |
| C | 2.731045000  | -0.657758000 | -0.111859000 |
| C | 3.508245000  | -0.573393000 | -1.273510000 |
| C | 3.320367000  | -1.205851000 | 1.033891000  |
| C | 4.836460000  | -0.986152000 | -1.279438000 |
| C | 4.649514000  | -1.611287000 | 1.034056000  |
| H | 2.724289000  | -1.308676000 | 1.933817000  |
| C | 5.433751000  | -1.506081000 | -0.123391000 |
| H | 5.084423000  | -2.018262000 | 1.941561000  |
| H | 3.061191000  | -0.205706000 | -2.190273000 |
| H | 5.415097000  | -0.910680000 | -2.194868000 |
| N | 6.787739000  | -1.863448000 | -0.110224000 |
| H | 7.050500000  | -2.533354000 | 0.598092000  |
| H | 7.181536000  | -2.097279000 | -1.010083000 |
| C | 1.741013000  | 2.106188000  | -0.457059000 |
| H | 1.142044000  | 2.926410000  | -0.850353000 |
| H | 2.522515000  | 1.906288000  | -1.192168000 |
| C | 2.418742000  | 2.545824000  | 0.862564000  |
| H | 3.068840000  | 3.395512000  | 0.628330000  |
| C | 1.451085000  | 2.938356000  | 1.982328000  |
| H | 0.819734000  | 3.783255000  | 1.691310000  |
| H | 0.791896000  | 2.110956000  | 2.258235000  |
| H | 2.002355000  | 3.234893000  | 2.878715000  |
| H | 3.076452000  | 1.744317000  | 1.207973000  |

**Structure 8a**

|   |              |              |              |
|---|--------------|--------------|--------------|
| C | 5.994102000  | -0.243492000 | -0.511781000 |
| C | 4.624863000  | -0.170698000 | -0.045654000 |
| C | 4.379226000  | 1.257075000  | 0.166124000  |
| N | 5.581104000  | 1.868044000  | -0.138316000 |
| N | 6.534126000  | 0.942373000  | -0.557085000 |
| C | 5.921205000  | 3.244050000  | -0.109284000 |
| C | 4.997622000  | 4.209279000  | 0.315720000  |
| C | 7.205083000  | 3.637563000  | -0.509955000 |
| C | 5.369534000  | 5.551537000  | 0.333357000  |
| H | 4.008262000  | 3.906710000  | 0.622602000  |
| C | 7.555719000  | 4.983248000  | -0.484330000 |
| H | 7.909709000  | 2.885975000  | -0.834743000 |
| C | 6.643664000  | 5.950091000  | -0.063911000 |
| H | 4.647460000  | 6.290314000  | 0.663253000  |
| H | 8.552413000  | 5.274807000  | -0.796991000 |
| H | 6.922311000  | 6.997422000  | -0.046383000 |
| O | 3.322421000  | 1.806803000  | 0.521786000  |
| H | 2.335074000  | 0.338787000  | 0.517474000  |
| C | 6.809917000  | -1.420570000 | -0.947812000 |
| H | 7.039132000  | -2.088358000 | -0.113840000 |
| H | 6.287685000  | -2.012904000 | -1.703207000 |
| H | 7.747849000  | -1.056657000 | -1.368438000 |
| C | 3.628356000  | -1.123205000 | 0.130867000  |
| N | 2.389367000  | -0.691788000 | 0.462511000  |
| C | 1.216557000  | -1.402994000 | 0.805689000  |
| C | -0.000165000 | -0.806990000 | 0.458878000  |
| C | 1.215210000  | -2.610657000 | 1.512569000  |
| C | -1.216913000 | -1.402859000 | 0.805920000  |
| C | -0.000157000 | -3.198740000 | 1.847928000  |
| C | -1.215532000 | -2.610523000 | 1.512811000  |
| H | -0.000156000 | 0.126874000  | -0.092451000 |
| H | -2.141903000 | -3.072470000 | 1.819711000  |
| H | -0.000160000 | -4.124519000 | 2.411735000  |
| H | 2.141624000  | -3.072673000 | 1.819258000  |
| N | -2.389613000 | -0.691465000 | 0.462843000  |
| C | -3.629027000 | -1.122418000 | 0.132180000  |
| C | -5.994500000 | -0.241852000 | -0.510249000 |
| C | -4.378335000 | 1.258412000  | 0.165256000  |
| C | -4.624987000 | -0.169437000 | -0.044876000 |
| N | -6.533782000 | 0.944311000  | -0.556592000 |
| N | -5.579955000 | 1.869828000  | -0.139302000 |
| C | -5.919152000 | 3.246083000  | -0.111613000 |
| C | -7.202972000 | 3.639991000  | -0.512083000 |
| C | -4.994729000 | 4.211176000  | 0.311868000  |
| C | -7.552717000 | 4.985932000  | -0.487771000 |
| H | -7.908248000 | 2.888505000  | -0.835693000 |
| C | -5.365756000 | 5.553696000  | 0.328208000  |
| H | -4.005415000 | 3.908304000  | 0.618599000  |
| C | -6.639823000 | 5.952642000  | -0.068869000 |
| H | -8.549374000 | 5.277797000  | -0.800259000 |

|   |              |              |              |
|---|--------------|--------------|--------------|
| H | -4.643037000 | 6.292365000  | 0.656932000  |
| H | -6.917778000 | 7.000173000  | -0.052360000 |
| O | -3.321023000 | 1.807846000  | 0.519884000  |
| H | -2.334683000 | 0.339136000  | 0.516689000  |
| C | -6.811319000 | -1.418879000 | -0.944538000 |
| H | -6.289947000 | -2.012312000 | -1.699665000 |
| H | -7.040399000 | -2.085669000 | -0.109731000 |
| H | -7.749298000 | -1.054817000 | -1.364929000 |
| C | 3.872311000  | -2.577228000 | -0.089531000 |
| C | 4.694046000  | -3.300922000 | 0.780037000  |
| C | 3.280801000  | -3.226994000 | -1.178210000 |
| C | 4.915904000  | -4.659607000 | 0.567066000  |
| H | 5.149242000  | -2.800314000 | 1.627136000  |
| C | 3.516410000  | -4.581637000 | -1.397084000 |
| H | 2.643836000  | -2.669315000 | -1.855203000 |
| C | 4.330540000  | -5.301310000 | -0.523174000 |
| H | 5.548412000  | -5.214953000 | 1.250206000  |
| H | 3.063488000  | -5.075146000 | -2.249341000 |
| H | 4.509125000  | -6.357067000 | -0.692199000 |
| C | -3.874121000 | -2.576490000 | -0.086642000 |
| C | -3.283978000 | -3.227677000 | -1.175212000 |
| C | -4.695599000 | -3.298806000 | 0.784312000  |
| C | -3.520660000 | -4.582376000 | -1.392585000 |
| H | -2.647223000 | -2.671066000 | -1.853282000 |
| C | -4.918540000 | -4.657546000 | 0.572823000  |
| H | -5.149747000 | -2.797085000 | 1.631316000  |
| C | -4.334520000 | -5.300678000 | -0.517296000 |
| H | -3.068785000 | -5.076999000 | -2.244753000 |
| H | -5.550843000 | -5.211818000 | 1.257023000  |
| H | -4.513944000 | -6.356478000 | -0.685159000 |

### Structure 8b

|   |             |              |              |
|---|-------------|--------------|--------------|
| C | 5.853456000 | -0.405028000 | -0.781765000 |
| C | 4.594392000 | -0.189645000 | -0.127412000 |
| C | 4.601912000 | 1.184687000  | 0.169420000  |
| N | 5.780036000 | 1.699706000  | -0.252396000 |
| N | 6.548783000 | 0.711776000  | -0.850227000 |
| C | 6.268268000 | 3.035088000  | -0.203032000 |
| C | 5.674509000 | 3.993597000  | 0.625249000  |
| C | 7.371668000 | 3.375767000  | -0.992673000 |
| C | 6.186232000 | 5.289081000  | 0.647415000  |
| H | 4.825045000 | 3.735013000  | 1.239117000  |
| C | 7.871538000 | 4.672934000  | -0.953327000 |
| H | 7.823513000 | 2.620021000  | -1.618834000 |
| C | 7.282755000 | 5.637808000  | -0.137094000 |
| H | 5.720157000 | 6.027319000  | 1.290180000  |
| H | 8.726864000 | 4.928908000  | -1.568487000 |
| H | 7.675071000 | 6.647804000  | -0.111945000 |
| O | 3.632648000 | 1.880015000  | 0.731641000  |
| H | 2.890933000 | 1.187609000  | 0.833452000  |



|   |              |              |              |
|---|--------------|--------------|--------------|
| C | 6.435654000  | -1.649620000 | -1.376074000 |
| H | 6.696257000  | -2.381307000 | -0.607685000 |
| H | 5.732536000  | -2.133586000 | -2.057851000 |
| H | 7.340202000  | -1.387449000 | -1.925822000 |
| C | 3.445775000  | -1.008495000 | 0.184139000  |
| N | 2.401589000  | -0.387699000 | 0.659821000  |
| C | 1.218408000  | -1.010304000 | 1.112146000  |
| C | 0.000000000  | -0.489504000 | 0.663088000  |
| C | 1.212487000  | -2.032935000 | 2.071384000  |
| C | -1.218417000 | -1.010320000 | 1.112123000  |
| C | -0.000004000 | -2.526083000 | 2.544000000  |
| C | -1.212491000 | -2.032952000 | 2.071362000  |
| H | -0.000004000 | 0.329070000  | -0.047302000 |
| H | -2.146438000 | -2.414878000 | 2.461883000  |
| H | -0.000007000 | -3.302305000 | 3.301409000  |
| H | 2.146441000  | -2.414830000 | 2.461920000  |
| N | -2.401576000 | -0.387722000 | 0.659753000  |
| C | -3.445841000 | -1.008492000 | 0.184222000  |
| C | -5.853413000 | -0.404842000 | -0.781849000 |
| C | -4.601847000 | 1.184768000  | 0.169464000  |
| C | -4.594409000 | -0.189565000 | -0.127343000 |
| N | -6.548690000 | 0.711997000  | -0.850289000 |
| N | -5.779921000 | 1.699865000  | -0.252393000 |
| C | -6.268064000 | 3.035287000  | -0.203086000 |
| C | -7.371202000 | 3.376088000  | -0.993037000 |
| C | -5.674509000 | 3.993691000  | 0.625466000  |
| C | -7.871004000 | 4.673284000  | -0.953746000 |
| H | -7.822902000 | 2.620416000  | -1.619390000 |
| C | -6.186160000 | 5.289205000  | 0.647568000  |
| H | -4.825258000 | 3.735007000  | 1.239583000  |
| C | -7.282415000 | 5.638059000  | -0.137259000 |
| H | -8.726126000 | 4.929359000  | -1.569148000 |
| H | -5.720244000 | 6.027365000  | 1.290537000  |
| H | -7.674675000 | 6.648078000  | -0.112155000 |
| O | -3.632540000 | 1.880066000  | 0.731684000  |
| H | -2.890795000 | 1.187735000  | 0.833371000  |
| C | -6.435625000 | -1.649348000 | -1.376325000 |
| H | -5.732655000 | -2.132995000 | -2.058488000 |
| H | -6.695860000 | -2.381314000 | -0.608084000 |
| H | -7.340386000 | -1.387135000 | -1.925702000 |
| C | 3.492091000  | -2.484102000 | -0.072358000 |
| C | 4.348623000  | -3.308104000 | 0.664484000  |
| C | 2.675882000  | -3.051032000 | -1.056259000 |
| C | 4.379472000  | -4.680650000 | 0.429566000  |
| H | 4.983229000  | -2.874406000 | 1.429741000  |
| C | 2.720923000  | -4.421186000 | -1.302249000 |
| H | 2.008897000  | -2.417079000 | -1.628952000 |
| C | 3.569036000  | -5.239400000 | -0.557621000 |
| H | 5.038005000  | -5.312657000 | 1.014777000  |
| H | 2.090987000  | -4.850252000 | -2.073256000 |
| H | 3.598650000  | -6.306680000 | -0.745545000 |

|   |              |              |              |
|---|--------------|--------------|--------------|
| C | -3.492306000 | -2.484111000 | -0.072163000 |
| C | -2.676077000 | -3.051238000 | -1.055935000 |
| C | -4.348976000 | -3.307946000 | 0.664709000  |
| C | -2.721247000 | -4.421410000 | -1.301784000 |
| H | -2.008980000 | -2.417414000 | -1.628641000 |
| C | -4.379945000 | -4.680517000 | 0.429945000  |
| H | -4.983577000 | -2.874098000 | 1.429884000  |
| C | -3.569498000 | -5.239457000 | -0.557126000 |
| H | -2.091302000 | -4.850631000 | -2.072697000 |
| H | -5.038579000 | -5.312391000 | 1.015184000  |
| H | -3.599204000 | -6.306753000 | -0.744938000 |

### Structure 9a

|   |               |              |              |
|---|---------------|--------------|--------------|
| C | -4.995342000  | 0.832399000  | -1.684800000 |
| C | -4.169102000  | 0.478654000  | -0.548819000 |
| C | -4.895726000  | -0.608516000 | 0.108485000  |
| N | -6.032658000  | -0.788542000 | -0.657289000 |
| N | -6.064144000  | 0.087042000  | -1.737262000 |
| C | -7.098660000  | -1.707134000 | -0.481797000 |
| C | -7.094293000  | -2.629187000 | 0.574066000  |
| C | -8.170944000  | -1.686760000 | -1.383747000 |
| C | -8.159593000  | -3.515930000 | 0.713016000  |
| H | -6.268728000  | -2.644856000 | 1.268751000  |
| C | -9.224535000  | -2.580958000 | -1.226582000 |
| H | -8.164580000  | -0.973332000 | -2.194815000 |
| C | -9.228770000  | -3.501224000 | -0.179452000 |
| H | -8.146315000  | -4.225671000 | 1.532863000  |
| I | -10.048179000 | -2.555054000 | -1.931594000 |
| I | -10.052430000 | -4.195919000 | -0.061980000 |
| O | -4.579790000  | -1.230067000 | 1.139269000  |
| H | -3.088300000  | -0.371762000 | 1.433785000  |
| C | -4.794272000  | 1.845863000  | -2.770387000 |
| H | -4.755122000  | 2.865826000  | -2.378391000 |
| H | -3.871036000  | 1.663568000  | -3.328880000 |
| H | -5.631904000  | 1.778048000  | -3.465171000 |
| C | -2.959636000  | 0.957301000  | -0.052235000 |
| N | -2.458867000  | 0.354678000  | 1.050105000  |
| C | -1.211603000  | 0.541854000  | 1.700921000  |
| C | 0.000016000   | 0.419336000  | 1.014065000  |
| C | -1.208652000  | 0.731600000  | 3.086921000  |
| C | 1.211655000   | 0.541843000  | 1.700887000  |
| C | 0.000058000   | 0.813140000  | 3.771104000  |
| C | 1.208748000   | 0.731591000  | 3.086887000  |
| H | 0.000002000   | 0.152942000  | -0.034395000 |
| C | -2.245524000  | 2.156853000  | -0.626173000 |
| H | -2.683350000  | 2.402754000  | -1.590089000 |
| H | -1.200341000  | 1.905395000  | -0.815943000 |
| C | -2.293331000  | 3.401877000  | 0.293978000  |
| H | -1.688632000  | 4.179610000  | -0.184048000 |
| C | -3.700676000  | 3.941720000  | 0.560519000  |

|   |              |              |              |
|---|--------------|--------------|--------------|
| H | -4.197692000 | 4.241215000  | -0.366714000 |
| H | -4.334759000 | 3.199412000  | 1.051775000  |
| H | -3.656024000 | 4.820865000  | 1.208382000  |
| H | -1.800642000 | 3.172401000  | 1.242582000  |
| H | 2.151788000  | 0.804456000  | 3.615468000  |
| H | 0.000074000  | 0.950945000  | 4.845973000  |
| H | -2.151677000 | 0.804471000  | 3.615530000  |
| N | 2.458897000  | 0.354660000  | 1.050028000  |
| C | 2.959618000  | 0.957271000  | -0.052339000 |
| C | 4.995193000  | 0.832194000  | -1.685068000 |
| C | 4.895798000  | -0.608395000 | 0.108494000  |
| C | 4.169060000  | 0.478608000  | -0.548957000 |
| N | 6.064027000  | 0.086879000  | -1.737479000 |
| N | 6.032674000  | -0.788508000 | -0.657343000 |
| C | 7.098727000  | -1.707028000 | -0.481783000 |
| C | 8.170864000  | -1.686864000 | -1.383912000 |
| C | 7.094560000  | -2.628799000 | 0.574328000  |
| C | 9.224507000  | -2.580989000 | -1.226680000 |
| H | 8.164349000  | -0.973650000 | -2.195168000 |
| C | 8.159908000  | -3.515474000 | 0.713341000  |
| H | 6.269107000  | -2.644309000 | 1.269149000  |
| C | 9.228939000  | -3.500975000 | -0.179305000 |
| H | 10.048036000 | -2.555248000 | -1.931833000 |
| H | 8.146784000  | -4.224996000 | 1.533379000  |
| H | 10.052639000 | -4.195615000 | -0.061783000 |
| O | 4.579993000  | -1.229735000 | 1.139444000  |
| H | 3.088326000  | -0.371805000 | 1.433668000  |
| C | 4.793992000  | 1.845447000  | -2.770828000 |
| H | 3.870729000  | 1.662998000  | -3.329226000 |
| H | 4.754813000  | 2.865480000  | -2.379019000 |
| H | 5.631580000  | 1.777549000  | -3.465656000 |
| C | 2.245442000  | 2.156780000  | -0.626289000 |
| H | 1.200276000  | 1.905255000  | -0.816061000 |
| H | 2.683256000  | 2.402707000  | -1.590203000 |
| C | 2.293151000  | 3.401805000  | 0.293869000  |
| H | 1.688411000  | 4.179500000  | -0.184165000 |
| H | 1.800454000  | 3.172290000  | 1.242459000  |
| C | 3.700452000  | 3.941742000  | 0.560453000  |
| H | 4.197469000  | 4.241289000  | -0.366763000 |
| H | 3.655723000  | 4.820872000  | 1.208330000  |
| H | 4.334576000  | 3.199470000  | 1.051711000  |

**Structure 9b**

|   |             |              |              |
|---|-------------|--------------|--------------|
| C | 5.074326000 | -0.790884000 | -1.682396000 |
| C | 4.189098000 | -0.525926000 | -0.583373000 |
| C | 4.774344000 | 0.585723000  | 0.050952000  |
| N | 5.899665000 | 0.915842000  | -0.625632000 |
| N | 6.079597000 | 0.060446000  | -1.700267000 |

|   |              |              |              |
|---|--------------|--------------|--------------|
| C | 6.857774000  | 1.938048000  | -0.375205000 |
| C | 6.585113000  | 2.988997000  | 0.507217000  |
| C | 8.086451000  | 1.882085000  | -1.041928000 |
| C | 7.550100000  | 3.971234000  | 0.719046000  |
| H | 5.637804000  | 3.038453000  | 1.022049000  |
| C | 9.035602000  | 2.874108000  | -0.820613000 |
| H | 8.276745000  | 1.068297000  | -1.726688000 |
| C | 8.776438000  | 3.922586000  | 0.061043000  |
| H | 7.332261000  | 4.782310000  | 1.404670000  |
| H | 9.985111000  | 2.823118000  | -1.341533000 |
| H | 9.520301000  | 4.692228000  | 0.231160000  |
| O | 4.331980000  | 1.208805000  | 1.123798000  |
| H | 3.472140000  | 0.693521000  | 1.339151000  |
| C | 5.008078000  | -1.816221000 | -2.773112000 |
| H | 5.037338000  | -2.835186000 | -2.379699000 |
| H | 4.096446000  | -1.712604000 | -3.368797000 |
| H | 5.864365000  | -1.677898000 | -3.433903000 |
| C | 2.965532000  | -1.106234000 | -0.073038000 |
| N | 2.445211000  | -0.511066000 | 0.964501000  |
| C | 1.217841000  | -0.858453000 | 1.570497000  |
| C | -0.000124000 | -0.614813000 | 0.922642000  |
| C | 1.210934000  | -1.328208000 | 2.890262000  |
| C | -1.218193000 | -0.858492000 | 1.570272000  |
| C | -0.000346000 | -1.565085000 | 3.533875000  |
| C | -1.211519000 | -1.328276000 | 2.890035000  |
| H | -0.000039000 | -0.181686000 | -0.070984000 |
| C | 2.376564000  | -2.359902000 | -0.694103000 |
| H | 2.811837000  | -2.521071000 | -1.679354000 |
| H | 1.305800000  | -2.204783000 | -0.842589000 |
| C | 2.567547000  | -3.627746000 | 0.172404000  |
| H | 2.048498000  | -4.449504000 | -0.332584000 |
| C | 4.025026000  | -4.024668000 | 0.422201000  |
| H | 4.549508000  | -4.241833000 | -0.512904000 |
| H | 4.578444000  | -3.235666000 | 0.938136000  |
| H | 4.075577000  | -4.923572000 | 1.042317000  |
| H | 2.057048000  | -3.484673000 | 1.128076000  |
| H | -2.153756000 | -1.488119000 | 3.400616000  |
| H | -0.000424000 | -1.925632000 | 4.556645000  |
| H | 2.153084000  | -1.487967000 | 3.401037000  |
| N | -2.445466000 | -0.511186000 | 0.964049000  |
| C | -2.965328000 | -1.105953000 | -0.073962000 |
| C | -5.073974000 | -0.790533000 | -1.683532000 |
| C | -4.774395000 | 0.585683000  | 0.050220000  |
| C | -4.188925000 | -0.525751000 | -0.584304000 |
| N | -6.079352000 | 0.060662000  | -1.701311000 |
| N | -5.899684000 | 0.915794000  | -0.626416000 |
| C | -6.858023000 | 1.937737000  | -0.375805000 |
| C | -8.086855000 | 1.881386000  | -1.042208000 |
| C | -6.585442000 | 2.988798000  | 0.506495000  |
| C | -9.036232000 | 2.873151000  | -0.820702000 |
| H | -8.277088000 | 1.067519000  | -1.726892000 |

|   |              |              |              |
|---|--------------|--------------|--------------|
| C | -7.550650000 | 3.970763000  | 0.718540000  |
| H | -5.638008000 | 3.038558000  | 1.021082000  |
| C | -8.777145000 | 3.921738000  | 0.060849000  |
| H | -9.985855000 | 2.821861000  | -1.341384000 |
| H | -7.332872000 | 4.781931000  | 1.404076000  |
| H | -9.521181000 | 4.691175000  | 0.231134000  |
| O | -4.332157000 | 1.208580000  | 1.123203000  |
| H | -3.472117000 | 0.693354000  | 1.338395000  |
| C | -5.007463000 | -1.815572000 | -2.774513000 |
| H | -4.096007000 | -1.711408000 | -3.370376000 |
| H | -5.036153000 | -2.834631000 | -2.381303000 |
| H | -5.863960000 | -1.677514000 | -3.435087000 |
| C | -2.375854000 | -2.359195000 | -0.695418000 |
| H | -1.305103000 | -2.203705000 | -0.843636000 |
| H | -2.810868000 | -2.520120000 | -1.680811000 |
| C | -2.566664000 | -3.627419000 | 0.170567000  |
| H | -2.047367000 | -4.448861000 | -0.334676000 |
| H | -2.056322000 | -3.484621000 | 1.126367000  |
| C | -4.024108000 | -4.024739000 | 0.419974000  |
| H | -4.548425000 | -4.241536000 | -0.515312000 |
| H | -4.074588000 | -4.923973000 | 1.039618000  |
| H | -4.577730000 | -3.236099000 | 0.936230000  |

**Atomic coordinates for the imine-one(I) and imine-one(II) tautomeric forms presented in Figure S1**

**Structure S1a**

|   |              |              |              |
|---|--------------|--------------|--------------|
| C | -0.751721000 | 2.346527000  | -0.159081000 |
| C | -1.032701000 | 0.414924000  | 1.150480000  |
| N | -2.021045000 | 0.600632000  | 0.195128000  |
| N | -1.810815000 | 1.753963000  | -0.570684000 |
| C | -3.140029000 | -0.220602000 | -0.104194000 |
| C | -3.437226000 | -1.345659000 | 0.677510000  |
| C | -3.957908000 | 0.106517000  | -1.193820000 |
| C | -4.545293000 | -2.126895000 | 0.358533000  |
| H | -2.808440000 | -1.600704000 | 1.516302000  |
| C | -5.059918000 | -0.687380000 | -1.494156000 |
| H | -3.724341000 | 0.975117000  | -1.791778000 |
| C | -5.362648000 | -1.808081000 | -0.723071000 |
| H | -4.766658000 | -2.994950000 | 0.969478000  |
| H | -5.684486000 | -0.423819000 | -2.340468000 |
| H | -6.222351000 | -2.423173000 | -0.962150000 |
| O | -0.933073000 | -0.491660000 | 1.949017000  |
| C | -0.269230000 | 3.611632000  | -0.784273000 |
| H | -0.200533000 | 4.414698000  | -0.043021000 |
| H | 0.728033000  | 3.478504000  | -1.215811000 |
| H | -0.953318000 | 3.918731000  | -1.575545000 |
| C | 1.358872000  | 1.231168000  | 0.767622000  |
| C | 2.400845000  | 2.130562000  | 1.385299000  |
| H | 2.372614000  | 3.131230000  | 0.940571000  |
| H | 2.186638000  | 2.251515000  | 2.451950000  |
| H | 3.404064000  | 1.725333000  | 1.265269000  |
| N | 1.551672000  | 0.164442000  | 0.102872000  |
| C | 2.818175000  | -0.344270000 | -0.243182000 |
| C | 3.080872000  | -1.685354000 | 0.127815000  |
| C | 3.738354000  | 0.352643000  | -1.030332000 |
| C | 4.281126000  | -2.273105000 | -0.294447000 |
| C | 4.921295000  | -0.249760000 | -1.453551000 |
| H | 3.499783000  | 1.363263000  | -1.343647000 |
| C | 5.187921000  | -1.565834000 | -1.077209000 |
| H | 4.496670000  | -3.296338000 | -0.003415000 |
| H | 5.618296000  | 0.298389000  | -2.076002000 |
| H | 6.103834000  | -2.048640000 | -1.398970000 |
| N | 2.186455000  | -2.352118000 | 0.950080000  |
| H | 1.259678000  | -1.949186000 | 1.012366000  |
| H | 2.199682000  | -3.359520000 | 0.908246000  |
| C | -0.099399000 | 1.624651000  | 0.997820000  |
| H | -0.176774000 | 2.234286000  | 1.906128000  |

**Structure S1b**

|   |              |              |              |
|---|--------------|--------------|--------------|
| C | -0.940331000 | 2.226351000  | -0.175146000 |
| C | -0.110315000 | 1.155581000  | -0.023550000 |
| C | -0.939885000 | -0.065593000 | -0.077852000 |
| N | -2.254936000 | 0.408134000  | -0.290951000 |
| C | -3.470285000 | -0.295946000 | -0.125462000 |
| C | -3.538787000 | -1.652772000 | -0.469414000 |
| C | -4.610978000 | 0.362485000  | 0.350615000  |
| C | -4.743467000 | -2.333377000 | -0.326901000 |
| H | -2.653518000 | -2.158313000 | -0.825096000 |
| C | -5.811716000 | -0.332736000 | 0.472959000  |
| H | -4.553064000 | 1.402669000  | 0.644010000  |
| C | -5.885903000 | -1.682223000 | 0.137756000  |
| H | -4.787457000 | -3.384351000 | -0.589450000 |
| H | -6.688390000 | 0.185918000  | 0.844445000  |
| H | -6.820697000 | -2.220924000 | 0.239000000  |
| O | -0.654114000 | -1.239372000 | 0.075527000  |
| C | -0.668970000 | 3.692773000  | -0.276739000 |
| H | -0.686862000 | 4.164902000  | 0.710289000  |
| H | 0.305187000  | 3.881401000  | -0.725988000 |
| H | -1.428053000 | 4.188237000  | -0.888518000 |
| C | 1.345345000  | 1.117846000  | 0.204073000  |
| C | 1.974854000  | 2.201054000  | 1.059091000  |
| H | 2.247480000  | 3.080908000  | 0.467257000  |
| H | 1.281416000  | 2.527485000  | 1.836992000  |
| H | 2.887708000  | 1.828644000  | 1.526150000  |
| N | 1.949854000  | 0.102611000  | -0.285526000 |
| C | 3.304340000  | -0.207915000 | -0.154795000 |
| C | 3.572711000  | -1.572050000 | 0.146753000  |
| C | 4.367203000  | 0.662182000  | -0.422487000 |
| C | 4.907028000  | -2.000743000 | 0.189904000  |
| C | 5.686790000  | 0.215168000  | -0.393478000 |
| H | 4.150257000  | 1.686661000  | -0.702511000 |
| C | 5.948881000  | -1.118996000 | -0.080050000 |
| H | 5.120812000  | -3.037248000 | 0.431488000  |
| H | 6.497518000  | 0.897075000  | -0.621209000 |
| H | 6.971441000  | -1.479215000 | -0.052394000 |
| N | 2.516087000  | -2.407825000 | 0.445905000  |
| H | 1.591886000  | -2.067781000 | 0.195237000  |
| H | 2.663622000  | -3.397489000 | 0.327476000  |
| H | -2.827073000 | 2.217792000  | -0.986977000 |
| N | -2.262204000 | 1.807374000  | -0.247440000 |

**Structure S2a**

|   |              |              |              |
|---|--------------|--------------|--------------|
| C | -1.003687000 | -1.007810000 | 1.692461000  |
| C | -1.455502000 | -1.001446000 | -0.614570000 |
| N | -2.559838000 | -0.731732000 | 0.181436000  |
| N | -2.249181000 | -0.738799000 | 1.548978000  |
| C | -3.891942000 | -0.436196000 | -0.212574000 |

|   |              |              |              |
|---|--------------|--------------|--------------|
| C | -4.275568000 | -0.496475000 | -1.559702000 |
| C | -4.831850000 | -0.083647000 | 0.765124000  |
| C | -5.591192000 | -0.201787000 | -1.909709000 |
| H | -3.554214000 | -0.767365000 | -2.314983000 |
| C | -6.140525000 | 0.205702000  | 0.393132000  |
| H | -4.530342000 | -0.042590000 | 1.801458000  |
| C | -6.530644000 | 0.150057000  | -0.943723000 |
| H | -5.878216000 | -0.251780000 | -2.954124000 |
| H | -6.858586000 | 0.476779000  | 1.159089000  |
| H | -7.551813000 | 0.376451000  | -1.227508000 |
| O | -1.404783000 | -1.040249000 | -1.825548000 |
| C | -0.369622000 | -1.103313000 | 3.038037000  |
| H | 0.071650000  | -2.093916000 | 3.188378000  |
| H | 0.436501000  | -0.370870000 | 3.140529000  |
| H | -1.113204000 | -0.922916000 | 3.814541000  |
| C | 0.981209000  | -0.501793000 | 0.109370000  |
| N | 2.001811000  | -1.214972000 | -0.182463000 |
| C | 3.257359000  | -0.697006000 | -0.558352000 |
| C | 4.392242000  | -1.327635000 | 0.003254000  |
| C | 3.428457000  | 0.282592000  | -1.542875000 |
| C | 5.666859000  | -0.918857000 | -0.407589000 |
| C | 4.700138000  | 0.663831000  | -1.957153000 |
| H | 2.551792000  | 0.722903000  | -2.001563000 |
| C | 5.819800000  | 0.065868000  | -1.377437000 |
| H | 6.539930000  | -1.388119000 | 0.034975000  |
| H | 4.815445000  | 1.414477000  | -2.729795000 |
| H | 6.816258000  | 0.357573000  | -1.689665000 |
| N | 4.216609000  | -2.289223000 | 0.998108000  |
| H | 3.305610000  | -2.730925000 | 0.968063000  |
| H | 4.972982000  | -2.952277000 | 1.089751000  |
| C | 0.957576000  | 0.985338000  | 0.300337000  |
| C | 1.853912000  | 1.568872000  | 1.207562000  |
| C | 0.038740000  | 1.805433000  | -0.366825000 |
| C | 1.825642000  | 2.938682000  | 1.447340000  |
| H | 2.575555000  | 0.945486000  | 1.722687000  |
| C | 0.023596000  | 3.179860000  | -0.135037000 |
| H | -0.643629000 | 1.382510000  | -1.093399000 |
| C | 0.911452000  | 3.749101000  | 0.774545000  |
| H | 2.520770000  | 3.374012000  | 2.156286000  |
| H | -0.684319000 | 3.803848000  | -0.668582000 |
| H | 0.893171000  | 4.817452000  | 0.957742000  |
| C | -0.309253000 | -1.265580000 | 0.376995000  |
| H | -0.056070000 | -2.328402000 | 0.292428000  |

### Structure S2b

|   |              |              |              |
|---|--------------|--------------|--------------|
| C | -1.133204000 | 1.566261000  | 0.846156000  |
| C | -0.524457000 | 0.549133000  | 0.169871000  |
| C | -1.577698000 | -0.275098000 | -0.452035000 |
| N | -2.789671000 | 0.368874000  | -0.089157000 |
| C | -4.100014000 | -0.158726000 | -0.145765000 |



|   |              |              |              |
|---|--------------|--------------|--------------|
| C | -4.461583000 | -1.006023000 | -1.202583000 |
| C | -5.046290000 | 0.184085000  | 0.828595000  |
| C | -5.759576000 | -1.501846000 | -1.266838000 |
| H | -3.724219000 | -1.278631000 | -1.942735000 |
| C | -6.345012000 | -0.311405000 | 0.738534000  |
| H | -4.762911000 | 0.810974000  | 1.664156000  |
| C | -6.709850000 | -1.156611000 | -0.306101000 |
| H | -6.029409000 | -2.161976000 | -2.083480000 |
| H | -7.068458000 | -0.041378000 | 1.499696000  |
| H | -7.719931000 | -1.543857000 | -0.370025000 |
| O | -1.511506000 | -1.272225000 | -1.141830000 |
| C | -0.585339000 | 2.735404000  | 1.598616000  |
| H | 0.402014000  | 2.513831000  | 2.000158000  |
| H | -0.481737000 | 3.608145000  | 0.945501000  |
| H | -1.247395000 | 3.000062000  | 2.426426000  |
| C | 0.918345000  | 0.243797000  | 0.072777000  |
| N | 1.261168000  | -0.986443000 | 0.194635000  |
| C | 2.548830000  | -1.497946000 | -0.023489000 |
| C | 2.996320000  | -2.475406000 | 0.899134000  |
| C | 3.325455000  | -1.216033000 | -1.154015000 |
| C | 4.231556000  | -3.097989000 | 0.684543000  |
| C | 4.541157000  | -1.858310000 | -1.366394000 |
| H | 2.951180000  | -0.507498000 | -1.882726000 |
| C | 4.997254000  | -2.793292000 | -0.436290000 |
| H | 4.582798000  | -3.834602000 | 1.400527000  |
| H | 5.121822000  | -1.638133000 | -2.254445000 |
| H | 5.944621000  | -3.297875000 | -0.589922000 |
| N | 2.223202000  | -2.742171000 | 2.027999000  |
| H | 1.248352000  | -2.492912000 | 1.902098000  |
| H | 2.347190000  | -3.664063000 | 2.421647000  |
| C | 1.848735000  | 1.401537000  | -0.147111000 |
| C | 2.982037000  | 1.568767000  | 0.659994000  |
| C | 1.579846000  | 2.351624000  | -1.140275000 |
| C | 3.823699000  | 2.661679000  | 0.477359000  |
| H | 3.200577000  | 0.839849000  | 1.431390000  |
| C | 2.435109000  | 3.434050000  | -1.336993000 |
| H | 0.704872000  | 2.232414000  | -1.769955000 |
| C | 3.556803000  | 3.594569000  | -0.525272000 |
| H | 4.692717000  | 2.782534000  | 1.114316000  |
| H | 2.224712000  | 4.151628000  | -2.122376000 |
| H | 4.218945000  | 4.440438000  | -0.672055000 |
| H | -3.065785000 | 2.244546000  | 0.630724000  |
| N | -2.509078000 | 1.411309000  | 0.802412000  |

### Structure S3a

|   |              |              |              |
|---|--------------|--------------|--------------|
| C | -1.244292000 | -1.173598000 | 1.574901000  |
| C | -1.721339000 | -0.933992000 | -0.713780000 |
| N | -2.821989000 | -0.770291000 | 0.116244000  |
| N | -2.495992000 | -0.914243000 | 1.472661000  |
| C | -4.162981000 | -0.458958000 | -0.232142000 |

|   |              |              |              |
|---|--------------|--------------|--------------|
| C | -4.559501000 | -0.379340000 | -1.574601000 |
| C | -5.099033000 | -0.232637000 | 0.785898000  |
| C | -5.883597000 | -0.072590000 | -1.879375000 |
| H | -3.841330000 | -0.553189000 | -2.360854000 |
| C | -6.416299000 | 0.071330000  | 0.458604000  |
| H | -4.787653000 | -0.299197000 | 1.817976000  |
| C | -6.819113000 | 0.154635000  | -0.873041000 |
| H | -6.180402000 | -0.013827000 | -2.920605000 |
| H | -7.131082000 | 0.243953000  | 1.255538000  |
| H | -7.846930000 | 0.391765000  | -1.121942000 |
| O | -1.683829000 | -0.843716000 | -1.922490000 |
| C | -0.593228000 | -1.394566000 | 2.897526000  |
| H | -0.124507000 | -2.383099000 | 2.937500000  |
| H | 0.193676000  | -0.654230000 | 3.070473000  |
| H | -1.332477000 | -1.317591000 | 3.695053000  |
| C | 0.718969000  | -0.475798000 | 0.035266000  |
| N | 1.738796000  | -1.141024000 | -0.346801000 |
| C | 2.976807000  | -0.552556000 | -0.691144000 |
| C | 4.148235000  | -1.052898000 | -0.092901000 |
| C | 3.041043000  | 0.415796000  | -1.702437000 |
| C | 5.389314000  | -0.519795000 | -0.495014000 |
| C | 4.277615000  | 0.908178000  | -2.100630000 |
| H | 2.129588000  | 0.753538000  | -2.178049000 |
| C | 5.445333000  | 0.457220000  | -1.498418000 |
| H | 4.332337000  | 1.651284000  | -2.888383000 |
| H | 6.407811000  | 0.854750000  | -1.804144000 |
| C | 0.682628000  | 0.983597000  | 0.381896000  |
| C | 1.603123000  | 1.491453000  | 1.309728000  |
| C | -0.271030000 | 1.850297000  | -0.167377000 |
| C | 1.565690000  | 2.830486000  | 1.684779000  |
| H | 2.352488000  | 0.834715000  | 1.735171000  |
| C | -0.295869000 | 3.194748000  | 0.198606000  |
| H | -0.973529000 | 1.490783000  | -0.908529000 |
| C | 0.616877000  | 3.687381000  | 1.128158000  |
| H | 2.281337000  | 3.205837000  | 2.407484000  |
| H | -1.030658000 | 3.855953000  | -0.246457000 |
| H | 0.591333000  | 4.732290000  | 1.415923000  |
| N | 6.566623000  | -0.926700000 | 0.144795000  |
| H | 6.558934000  | -1.853753000 | 0.543245000  |
| H | 7.415536000  | -0.744846000 | -0.370487000 |
| C | 4.093422000  | -2.122388000 | 0.968200000  |
| H | 3.081021000  | -2.509169000 | 1.074844000  |
| H | 4.740835000  | -2.971951000 | 0.716695000  |
| H | 4.422768000  | -1.745656000 | 1.944130000  |
| C | -0.560876000 | -1.280705000 | 0.233988000  |
| H | -0.291927000 | -2.324629000 | 0.036901000  |

**Structure S3b**

|   |              |             |             |
|---|--------------|-------------|-------------|
| C | -1.434663000 | 1.360741000 | 1.153781000 |
| C | -0.786336000 | 0.574690000 | 0.252629000 |

|   |              |              |              |
|---|--------------|--------------|--------------|
| C | -1.799079000 | -0.189080000 | -0.497937000 |
| N | -3.035929000 | 0.240360000  | 0.042426000  |
| C | -4.305050000 | -0.364392000 | -0.098199000 |
| C | -4.640792000 | -1.007819000 | -1.298004000 |
| C | -5.240439000 | -0.298092000 | 0.942730000  |
| C | -5.901904000 | -1.577848000 | -1.437489000 |
| H | -3.910834000 | -1.069910000 | -2.091161000 |
| C | -6.502683000 | -0.863435000 | 0.778028000  |
| H | -4.974181000 | 0.167794000  | 1.882597000  |
| C | -6.841735000 | -1.506567000 | -0.409523000 |
| H | -6.151018000 | -2.079370000 | -2.365910000 |
| H | -7.217316000 | -0.808339000 | 1.591648000  |
| H | -7.823247000 | -1.949252000 | -0.531959000 |
| O | -1.679785000 | -0.998083000 | -1.396707000 |
| C | -0.930131000 | 2.348080000  | 2.153337000  |
| H | 0.113307000  | 2.592820000  | 1.966005000  |
| H | -1.510602000 | 3.275850000  | 2.118096000  |
| H | -1.017460000 | 1.942494000  | 3.165808000  |
| C | 0.674223000  | 0.410394000  | 0.048536000  |
| N | 1.121366000  | -0.787317000 | 0.075899000  |
| C | 2.435621000  | -1.159076000 | -0.263079000 |
| C | 3.172592000  | -1.936291000 | 0.651518000  |
| C | 2.947279000  | -0.873321000 | -1.537585000 |
| C | 4.459475000  | -2.373334000 | 0.281351000  |
| C | 4.208697000  | -1.336557000 | -1.889402000 |
| H | 2.343642000  | -0.314954000 | -2.241268000 |
| C | 4.970420000  | -2.070655000 | -0.988377000 |
| H | 4.603141000  | -1.124500000 | -2.877165000 |
| H | 5.960762000  | -2.419068000 | -1.263726000 |
| C | 1.477503000  | 1.659707000  | -0.169442000 |
| C | 2.700059000  | 1.858775000  | 0.486415000  |
| C | 0.996009000  | 2.665493000  | -1.018062000 |
| C | 3.420365000  | 3.034456000  | 0.297700000  |
| H | 3.086028000  | 1.091043000  | 1.145353000  |
| C | 1.728570000  | 3.832145000  | -1.224114000 |
| H | 0.050423000  | 2.524600000  | -1.529339000 |
| C | 2.940691000  | 4.022145000  | -0.562552000 |
| H | 4.360736000  | 3.177008000  | 0.818128000  |
| H | 1.351808000  | 4.592809000  | -1.898863000 |
| H | 3.507893000  | 4.933428000  | -0.715455000 |
| N | 5.255493000  | -3.068614000 | 1.202328000  |
| H | 4.758051000  | -3.592557000 | 1.907079000  |
| H | 6.002617000  | -3.609304000 | 0.791237000  |
| C | 2.609562000  | -2.286838000 | 2.005534000  |
| H | 1.560917000  | -1.999085000 | 2.069881000  |
| H | 2.663169000  | -3.366142000 | 2.196361000  |
| H | 3.154062000  | -1.789368000 | 2.817556000  |
| N | -2.798948000 | 1.096274000  | 1.128297000  |
| H | -3.417026000 | 1.903804000  | 1.129339000  |

**Structure S4a**

|   |              |              |              |
|---|--------------|--------------|--------------|
| C | 1.343530000  | 0.373226000  | 2.057602000  |
| C | 1.740007000  | 0.932904000  | -0.188795000 |
| N | 2.746387000  | 0.182832000  | 0.391584000  |
| N | 2.478629000  | -0.125385000 | 1.735902000  |
| C | 3.954027000  | -0.289283000 | -0.186438000 |
| C | 4.256137000  | -0.041960000 | -1.532984000 |
| C | 4.853973000  | -1.012710000 | 0.607704000  |
| C | 5.451167000  | -0.520132000 | -2.064994000 |
| H | 3.565084000  | 0.514178000  | -2.147020000 |
| C | 6.041437000  | -1.481535000 | 0.055426000  |
| H | 4.613828000  | -1.201885000 | 1.643516000  |
| C | 6.350290000  | -1.239870000 | -1.281882000 |
| H | 5.674944000  | -0.323850000 | -3.107697000 |
| H | 6.728611000  | -2.040929000 | 0.680539000  |
| H | 7.277064000  | -1.607666000 | -1.706726000 |
| O | 1.687906000  | 1.353868000  | -1.327543000 |
| C | 0.774966000  | 0.218836000  | 3.425509000  |
| H | 0.590418000  | 1.196539000  | 3.882954000  |
| H | -0.180842000 | -0.309535000 | 3.377257000  |
| H | 1.464140000  | -0.344152000 | 4.055197000  |
| C | -0.702552000 | 0.670396000  | 0.530116000  |
| N | -0.920132000 | -0.582897000 | 0.647358000  |
| C | -2.079225000 | -1.245458000 | 0.198265000  |
| C | -2.617389000 | -2.254396000 | 1.008123000  |
| C | -2.648680000 | -1.040915000 | -1.067257000 |
| C | -3.725794000 | -2.985608000 | 0.603301000  |
| C | -3.736132000 | -1.793842000 | -1.488346000 |
| H | -2.222070000 | -0.303025000 | -1.735317000 |
| C | -4.304781000 | -2.769642000 | -0.656032000 |
| H | -4.151623000 | -1.624834000 | -2.476859000 |
| C | -1.660232000 | 1.735598000  | 0.095884000  |
| C | -1.264795000 | 2.731215000  | -0.808000000 |
| C | -2.949454000 | 1.786413000  | 0.645079000  |
| C | -2.153110000 | 3.741485000  | -1.172158000 |
| H | -0.272457000 | 2.694003000  | -1.244220000 |
| C | -3.824827000 | 2.809341000  | 0.294786000  |
| H | -3.263823000 | 1.025699000  | 1.349276000  |
| C | -3.431981000 | 3.786141000  | -0.620371000 |
| H | -1.842038000 | 4.496226000  | -1.885789000 |
| H | -4.815199000 | 2.842532000  | 0.734739000  |
| H | -4.117746000 | 4.578898000  | -0.897607000 |
| H | -2.154153000 | -2.456518000 | 1.967055000  |
| H | -4.136993000 | -3.745785000 | 1.259974000  |
| N | -5.442145000 | -3.477517000 | -1.054067000 |
| H | -5.595277000 | -3.533116000 | -2.050296000 |
| H | -5.585339000 | -4.366655000 | -0.597977000 |
| C | 0.700515000  | 1.138476000  | 0.929782000  |
| H | 0.678465000  | 2.207623000  | 1.167975000  |

**Structure S4b**

|   |              |              |              |
|---|--------------|--------------|--------------|
| C | 1.434807000  | 1.464549000  | 1.019355000  |
| C | 0.745808000  | 0.531910000  | 0.309414000  |
| C | 1.722917000  | -0.341533000 | -0.363529000 |
| N | 2.983598000  | 0.179753000  | 0.017624000  |
| C | 4.251963000  | -0.430499000 | -0.100139000 |
| C | 4.521565000  | -1.274780000 | -1.186971000 |
| C | 5.252301000  | -0.172537000 | 0.846472000  |
| C | 5.782118000  | -1.850052000 | -1.308750000 |
| H | 3.742437000  | -1.483286000 | -1.904772000 |
| C | 6.512073000  | -0.748014000 | 0.699128000  |
| H | 5.038692000  | 0.450640000  | 1.705094000  |
| C | 6.785766000  | -1.589331000 | -0.376115000 |
| H | 5.979855000  | -2.506929000 | -2.148409000 |
| H | 7.277030000  | -0.543272000 | 1.439856000  |
| H | 7.765834000  | -2.038819000 | -0.484638000 |
| O | 1.561471000  | -1.291352000 | -1.104718000 |
| C | 0.973133000  | 2.602803000  | 1.867385000  |
| H | 1.579410000  | 3.497221000  | 1.691545000  |
| H | -0.066261000 | 2.847449000  | 1.656932000  |
| H | 1.062237000  | 2.347521000  | 2.927767000  |
| C | -0.721817000 | 0.327804000  | 0.225783000  |
| N | -1.149831000 | -0.842132000 | 0.521518000  |
| C | -2.474884000 | -1.277360000 | 0.345029000  |
| C | -3.075911000 | -2.010665000 | 1.377432000  |
| C | -3.182903000 | -1.130742000 | -0.856835000 |
| C | -4.361587000 | -2.517991000 | 1.243321000  |
| C | -4.455846000 | -1.666861000 | -1.004668000 |
| H | -2.721074000 | -0.615619000 | -1.690149000 |
| C | -5.074608000 | -2.357561000 | 0.046573000  |
| H | -4.977642000 | -1.550404000 | -1.949654000 |
| C | -1.547466000 | 1.512256000  | -0.187622000 |
| C | -1.142848000 | 2.314369000  | -1.262931000 |
| C | -2.708367000 | 1.863477000  | 0.515615000  |
| C | -1.892152000 | 3.426088000  | -1.642008000 |
| H | -0.243448000 | 2.057076000  | -1.811118000 |
| C | -3.444456000 | 2.986517000  | 0.149952000  |
| H | -3.032375000 | 1.254363000  | 1.350557000  |
| C | -3.043221000 | 3.767807000  | -0.934018000 |
| H | -1.575189000 | 4.026426000  | -2.487640000 |
| H | -4.335457000 | 3.249658000  | 0.708973000  |
| H | -3.622739000 | 4.637497000  | -1.222707000 |
| H | -2.517975000 | -2.173885000 | 2.292351000  |
| H | -4.812099000 | -3.062661000 | 2.067354000  |
| N | -6.385501000 | -2.837069000 | -0.079801000 |
| H | -6.689268000 | -3.009323000 | -1.027376000 |
| H | -6.621613000 | -3.605741000 | 0.531224000  |
| H | 3.400409000  | 2.009392000  | 0.771508000  |
| N | 2.800186000  | 1.208817000  | 0.953490000  |

### Structure S5a

|   |              |              |              |
|---|--------------|--------------|--------------|
| C | -0.926494000 | 1.982933000  | -1.133926000 |
| C | -1.162011000 | 0.613703000  | 0.760675000  |
| N | -2.224316000 | 0.538427000  | -0.125826000 |
| N | -2.040099000 | 1.359084000  | -1.246812000 |
| C | -3.395810000 | -0.260561000 | -0.052741000 |
| C | -3.656919000 | -1.054144000 | 1.072897000  |
| C | -4.301981000 | -0.246983000 | -1.121265000 |
| C | -4.818027000 | -1.822194000 | 1.113859000  |
| H | -2.959848000 | -1.067605000 | 1.896229000  |
| C | -5.455613000 | -1.021721000 | -1.059272000 |
| H | -4.095369000 | 0.366826000  | -1.985611000 |
| C | -5.723318000 | -1.813940000 | 0.055549000  |
| H | -5.010846000 | -2.432800000 | 1.988926000  |
| H | -6.148501000 | -1.003120000 | -1.893146000 |
| H | -6.623612000 | -2.415820000 | 0.098008000  |
| O | -1.022079000 | 0.015305000  | 1.807279000  |
| C | -0.451299000 | 2.938277000  | -2.175539000 |
| H | -0.306655000 | 3.938115000  | -1.752943000 |
| H | 0.510199000  | 2.617580000  | -2.588920000 |
| H | -1.179187000 | 2.998797000  | -2.984790000 |
| C | 1.212955000  | 1.095604000  | -0.044736000 |
| N | 1.291355000  | -0.134033000 | -0.359303000 |
| C | 2.510168000  | -0.814469000 | -0.578079000 |
| C | 3.289706000  | -0.618805000 | -1.718925000 |
| C | 2.850874000  | -1.830293000 | 0.344175000  |
| C | 4.419071000  | -1.400962000 | -1.956202000 |
| C | 3.993132000  | -2.602106000 | 0.096763000  |
| C | 4.768359000  | -2.391367000 | -1.039879000 |
| H | 4.268422000  | -3.376306000 | 0.806252000  |
| H | 2.984851000  | 0.133592000  | -2.438372000 |
| H | 5.009898000  | -1.243552000 | -2.850662000 |
| C | 2.371987000  | 2.044216000  | 0.198311000  |
| H | 2.044498000  | 3.073285000  | 0.015198000  |
| H | 3.170806000  | 1.824141000  | -0.511252000 |
| C | 2.949679000  | 1.934547000  | 1.631348000  |
| H | 3.839255000  | 2.571880000  | 1.670820000  |
| C | 1.985565000  | 2.332133000  | 2.753407000  |
| H | 1.615722000  | 3.355034000  | 2.620755000  |
| H | 1.125630000  | 1.659950000  | 2.812719000  |
| H | 2.493137000  | 2.293283000  | 3.720711000  |
| H | 3.294168000  | 0.908949000  | 1.790305000  |
| H | 5.642496000  | -3.009203000 | -1.211616000 |
| N | 2.092177000  | -1.986357000 | 1.500299000  |
| H | 1.152875000  | -1.608489000 | 1.460382000  |
| H | 2.138902000  | -2.895272000 | 1.936177000  |
| C | -0.202003000 | 1.641049000  | 0.147316000  |
| H | -0.172154000 | 2.518956000  | 0.801669000  |

### Structure S5b

|   |              |              |              |
|---|--------------|--------------|--------------|
| C | -1.028028000 | 2.062215000  | -0.702289000 |
| C | -0.231363000 | 1.006830000  | -0.384758000 |
| C | -1.090051000 | -0.184234000 | -0.256360000 |
| N | -2.391402000 | 0.282906000  | -0.536330000 |
| C | -3.623554000 | -0.357849000 | -0.269031000 |
| C | -3.722919000 | -1.750036000 | -0.394674000 |
| C | -4.748900000 | 0.393785000  | 0.091202000  |
| C | -4.943448000 | -2.371784000 | -0.152669000 |
| H | -2.849171000 | -2.325455000 | -0.661891000 |
| C | -5.965624000 | -0.245825000 | 0.315840000  |
| H | -4.666790000 | 1.465677000  | 0.216209000  |
| C | -6.070841000 | -1.629305000 | 0.197659000  |
| H | -5.011734000 | -3.449728000 | -0.246301000 |
| H | -6.830518000 | 0.344875000  | 0.596142000  |
| H | -7.018182000 | -2.123646000 | 0.377825000  |
| O | -0.820855000 | -1.326201000 | 0.075617000  |
| C | -0.706182000 | 3.480665000  | -1.041935000 |
| H | -0.949623000 | 4.148427000  | -0.209745000 |
| H | 0.350684000  | 3.593244000  | -1.278535000 |
| H | -1.283465000 | 3.815464000  | -1.909545000 |
| C | 1.229887000  | 0.943605000  | -0.169326000 |
| N | 1.812083000  | -0.049878000 | -0.721656000 |
| C | 3.171282000  | -0.377368000 | -0.575796000 |
| C | 4.218945000  | 0.385296000  | -1.094893000 |
| C | 3.439547000  | -1.642663000 | 0.004649000  |
| C | 5.535695000  | -0.071111000 | -1.034369000 |
| C | 4.768456000  | -2.080906000 | 0.069210000  |
| C | 5.804462000  | -1.305552000 | -0.445424000 |
| H | 4.984036000  | -3.043132000 | 0.523612000  |
| H | 3.990129000  | 1.326670000  | -1.582780000 |
| H | 6.337170000  | 0.526748000  | -1.452116000 |
| C | 1.883150000  | 1.949432000  | 0.769846000  |
| H | 1.274186000  | 2.856028000  | 0.822640000  |
| H | 2.859708000  | 2.234172000  | 0.374945000  |
| C | 2.077055000  | 1.391777000  | 2.200185000  |
| H | 2.651443000  | 2.134211000  | 2.764978000  |
| C | 0.777844000  | 1.075997000  | 2.946587000  |
| H | 0.128473000  | 1.955722000  | 3.009460000  |
| H | 0.215876000  | 0.273380000  | 2.463077000  |
| H | 0.994072000  | 0.751560000  | 3.968038000  |
| H | 2.699468000  | 0.494419000  | 2.147004000  |
| H | 6.823107000  | -1.673375000 | -0.392011000 |
| N | 2.390526000  | -2.368822000 | 0.549613000  |
| H | 1.458672000  | -2.106319000 | 0.241515000  |
| H | 2.533798000  | -3.363172000 | 0.637222000  |
| H | -2.912866000 | 1.972230000  | -1.514004000 |
| N | -2.363224000 | 1.673479000  | -0.712001000 |

**Structure S6a**

|   |              |              |              |
|---|--------------|--------------|--------------|
| C | -1.262764000 | 2.013584000  | -1.112151000 |
| C | -1.448467000 | 0.650059000  | 0.790710000  |
| N | -2.461782000 | 0.466148000  | -0.137375000 |
| N | -2.311554000 | 1.292673000  | -1.259081000 |
| C | -3.563132000 | -0.428002000 | -0.093264000 |
| C | -3.751386000 | -1.286479000 | 0.999019000  |
| C | -4.473452000 | -0.446440000 | -1.158479000 |
| C | -4.845166000 | -2.148589000 | 1.010973000  |
| H | -3.051538000 | -1.274925000 | 1.820015000  |
| C | -5.558488000 | -1.316246000 | -1.126134000 |
| H | -4.321815000 | 0.215613000  | -1.998239000 |
| C | -5.754152000 | -2.172298000 | -0.043985000 |
| H | -4.981602000 | -2.808539000 | 1.860498000  |
| H | -6.254846000 | -1.321327000 | -1.957362000 |
| H | -6.601474000 | -2.847802000 | -0.024245000 |
| O | -1.305420000 | 0.089101000  | 1.856802000  |
| C | -0.833392000 | 2.998793000  | -2.145389000 |
| H | -0.789674000 | 4.010175000  | -1.727638000 |
| H | 0.166396000  | 2.757077000  | -2.519592000 |
| H | -1.532969000 | 2.991444000  | -2.981395000 |
| C | 0.908132000  | 1.323582000  | 0.046253000  |
| N | 1.099907000  | 0.165619000  | -0.441183000 |
| C | 2.384450000  | -0.365787000 | -0.704483000 |
| C | 2.862543000  | -1.428788000 | 0.080429000  |
| C | 3.106465000  | 0.094265000  | -1.814645000 |
| C | 4.109349000  | -1.998904000 | -0.251962000 |
| C | 4.327486000  | -0.491661000 | -2.130020000 |
| C | 4.834784000  | -1.525529000 | -1.354447000 |
| C | 1.974746000  | 2.304272000  | 0.498945000  |
| H | 1.606620000  | 3.326480000  | 0.356289000  |
| H | 2.855416000  | 2.181917000  | -0.133336000 |
| C | 2.407312000  | 2.119745000  | 1.974187000  |
| H | 3.251661000  | 2.795292000  | 2.147459000  |
| C | 1.318317000  | 2.386427000  | 3.018146000  |
| H | 0.905494000  | 3.396067000  | 2.913960000  |
| H | 0.496612000  | 1.669453000  | 2.948568000  |
| H | 1.733499000  | 2.309597000  | 4.026672000  |
| H | 2.797448000  | 1.105194000  | 2.097338000  |
| H | 5.791376000  | -1.975760000 | -1.599001000 |
| C | 2.078458000  | -1.961312000 | 1.253624000  |
| H | 1.113333000  | -1.466947000 | 1.348834000  |
| H | 1.881319000  | -3.035745000 | 1.145798000  |
| H | 2.622734000  | -1.827284000 | 2.195962000  |
| N | 4.650631000  | -3.005146000 | 0.553930000  |
| H | 3.991368000  | -3.566373000 | 1.071840000  |
| H | 5.369675000  | -3.564105000 | 0.118977000  |
| H | 2.695101000  | 0.884886000  | -2.430542000 |
| H | 4.886952000  | -0.141059000 | -2.990352000 |
| C | -0.555760000 | 1.747675000  | 0.195812000  |
| H | -0.623450000 | 2.628612000  | 0.842203000  |



**Structure S6b**

|   |              |              |              |
|---|--------------|--------------|--------------|
| C | -1.355168000 | 2.094209000  | -0.499223000 |
| C | -0.547362000 | 1.033073000  | -0.243546000 |
| C | -1.383194000 | -0.178609000 | -0.226506000 |
| N | -2.687754000 | 0.285397000  | -0.510896000 |
| C | -3.911578000 | -0.396136000 | -0.322244000 |
| C | -3.975361000 | -1.780102000 | -0.535818000 |
| C | -5.065371000 | 0.307329000  | 0.046285000  |
| C | -5.188199000 | -2.441097000 | -0.372072000 |
| H | -3.080535000 | -2.319331000 | -0.808705000 |
| C | -6.273341000 | -0.370637000 | 0.191921000  |
| H | -5.012354000 | 1.370986000  | 0.238736000  |
| C | -6.343116000 | -1.746057000 | -0.013880000 |
| H | -5.228371000 | -3.512448000 | -0.533603000 |
| H | -7.159975000 | 0.183407000  | 0.479282000  |
| H | -7.283965000 | -2.270558000 | 0.104638000  |
| O | -1.098298000 | -1.333972000 | 0.030975000  |
| C | -1.046034000 | 3.538982000  | -0.715955000 |
| H | -1.389482000 | 4.144506000  | 0.128405000  |
| H | 0.025041000  | 3.691366000  | -0.839834000 |
| H | -1.545080000 | 3.916127000  | -1.614503000 |
| C | 0.918124000  | 1.010280000  | -0.016101000 |
| N | 1.583509000  | 0.208159000  | -0.751722000 |
| C | 2.983196000  | 0.051302000  | -0.672220000 |
| C | 3.504326000  | -1.175956000 | -0.222981000 |
| C | 3.830768000  | 1.058199000  | -1.158042000 |
| C | 4.903091000  | -1.352333000 | -0.226049000 |
| C | 5.206180000  | 0.853770000  | -1.168019000 |
| C | 5.746424000  | -0.336150000 | -0.697909000 |
| C | 1.484476000  | 1.864064000  | 1.112271000  |
| H | 0.823727000  | 2.717431000  | 1.290561000  |
| H | 2.458071000  | 2.255741000  | 0.812172000  |
| C | 1.660475000  | 1.084890000  | 2.437158000  |
| H | 2.153094000  | 1.758728000  | 3.146735000  |
| C | 0.362539000  | 0.554788000  | 3.053487000  |
| H | -0.357750000 | 1.362277000  | 3.221854000  |
| H | -0.113629000 | -0.196547000 | 2.419063000  |
| H | 0.563417000  | 0.086266000  | 4.020961000  |
| H | 2.356026000  | 0.258031000  | 2.267851000  |
| H | 6.820982000  | -0.488360000 | -0.697123000 |
| C | 2.599124000  | -2.284350000 | 0.253995000  |
| H | 1.549360000  | -2.033957000 | 0.105923000  |
| H | 2.791373000  | -3.216598000 | -0.293127000 |
| H | 2.751529000  | -2.500317000 | 1.318480000  |
| N | 5.457859000  | -2.527743000 | 0.292895000  |
| H | 4.865368000  | -3.344182000 | 0.272732000  |
| H | 6.397420000  | -2.730399000 | -0.015244000 |
| H | 3.403230000  | 1.974988000  | -1.546053000 |
| H | 5.863353000  | 1.628659000  | -1.547751000 |
| H | -3.208824000 | 2.032816000  | -1.377448000 |
| N | -2.684419000 | 1.686531000  | -0.577291000 |

**Structure S7a**

|   |              |              |              |
|---|--------------|--------------|--------------|
| C | 1.138372000  | 1.381569000  | 1.677563000  |
| C | 1.488777000  | 0.828510000  | -0.577970000 |
| N | 2.430385000  | 0.293959000  | 0.289278000  |
| N | 2.184816000  | 0.644728000  | 1.623010000  |
| C | 3.550127000  | -0.526847000 | -0.004048000 |
| C | 3.805342000  | -0.957024000 | -1.313750000 |
| C | 4.410183000  | -0.908887000 | 1.034311000  |
| C | 4.915044000  | -1.759863000 | -1.566100000 |
| H | 3.144593000  | -0.664692000 | -2.114956000 |
| C | 5.512131000  | -1.712192000 | 0.759831000  |
| H | 4.206063000  | -0.577617000 | 2.041866000  |
| C | 5.774517000  | -2.143028000 | -0.539296000 |
| H | 5.103125000  | -2.087412000 | -2.582559000 |
| H | 6.169005000  | -2.001589000 | 1.572667000  |
| H | 6.634755000  | -2.768643000 | -0.747325000 |
| O | 1.443299000  | 0.717768000  | -1.784395000 |
| C | 0.617400000  | 1.914880000  | 2.968589000  |
| H | 0.584642000  | 3.009471000  | 2.955358000  |
| H | -0.401844000 | 1.560008000  | 3.150982000  |
| H | 1.255020000  | 1.590034000  | 3.790990000  |
| C | -0.929902000 | 1.194056000  | 0.191146000  |
| N | -1.136421000 | -0.058901000 | 0.255631000  |
| C | -2.431665000 | -0.628233000 | 0.189020000  |
| C | -3.302478000 | -0.607900000 | 1.283421000  |
| C | -2.817235000 | -1.338928000 | -0.952874000 |
| C | -4.534366000 | -1.253446000 | 1.228141000  |
| C | -4.053097000 | -1.971803000 | -1.013760000 |
| H | -2.136523000 | -1.393826000 | -1.794595000 |
| C | -4.934163000 | -1.942010000 | 0.076233000  |
| H | -4.335709000 | -2.503432000 | -1.917048000 |
| H | -3.006060000 | -0.098750000 | 2.193952000  |
| H | -5.192367000 | -1.222224000 | 2.091033000  |
| N | -6.200957000 | -2.538968000 | -0.005136000 |
| H | -6.276802000 | -3.289258000 | -0.676957000 |
| H | -6.610507000 | -2.795467000 | 0.881667000  |
| C | -1.976067000 | 2.277212000  | -0.000101000 |
| H | -1.652706000 | 3.184167000  | 0.523299000  |
| H | -2.909206000 | 1.949762000  | 0.460936000  |
| C | -2.264247000 | 2.620458000  | -1.482545000 |
| H | -3.115232000 | 3.309900000  | -1.491189000 |
| C | -1.096543000 | 3.242616000  | -2.254533000 |
| H | -0.732167000 | 4.150871000  | -1.761495000 |
| H | -0.259569000 | 2.548940000  | -2.363766000 |
| H | -1.417550000 | 3.527572000  | -3.260156000 |
| H | -2.600782000 | 1.711650000  | -1.989923000 |
| C | 0.532777000  | 1.631438000  | 0.316813000  |
| H | 0.629228000  | 2.689202000  | 0.052353000  |

### Structure S7b

|   |              |              |              |
|---|--------------|--------------|--------------|
| C | -1.199358000 | 1.912227000  | -0.633792000 |
| C | -0.469143000 | 0.829286000  | -0.264853000 |
| C | -1.382468000 | -0.322463000 | -0.170175000 |
| N | -2.646854000 | 0.197195000  | -0.536332000 |
| C | -3.916495000 | -0.386340000 | -0.325723000 |
| C | -4.064939000 | -1.777515000 | -0.416165000 |
| C | -5.031610000 | 0.418263000  | -0.058501000 |
| C | -5.321937000 | -2.343727000 | -0.231771000 |
| H | -3.200404000 | -2.394351000 | -0.611210000 |
| C | -6.284416000 | -0.166848000 | 0.109488000  |
| H | -4.914634000 | 1.489702000  | 0.039009000  |
| C | -6.438216000 | -1.548287000 | 0.026096000  |
| H | -5.427305000 | -3.420814000 | -0.297549000 |
| H | -7.140259000 | 0.465506000  | 0.317798000  |
| H | -7.413862000 | -2.000068000 | 0.161713000  |
| O | -1.182416000 | -1.465278000 | 0.194484000  |
| C | -0.789597000 | 3.310367000  | -0.960973000 |
| H | -1.132968000 | 4.009889000  | -0.192687000 |
| H | 0.293718000  | 3.386964000  | -1.041618000 |
| H | -1.220673000 | 3.632534000  | -1.914537000 |
| C | 0.988024000  | 0.744653000  | 0.003071000  |
| N | 1.632137000  | -0.123537000 | -0.675109000 |
| C | 3.021664000  | -0.336085000 | -0.534690000 |
| C | 3.968802000  | 0.574996000  | -1.016644000 |
| C | 3.480880000  | -1.555027000 | -0.019547000 |
| C | 5.330701000  | 0.292203000  | -0.955681000 |
| C | 4.840718000  | -1.829701000 | 0.058511000  |
| H | 2.755852000  | -2.286015000 | 0.319194000  |
| C | 5.791145000  | -0.911599000 | -0.409517000 |
| H | 5.170584000  | -2.774509000 | 0.479668000  |
| H | 3.635831000  | 1.504486000  | -1.465434000 |
| H | 6.043972000  | 1.016044000  | -1.338146000 |
| N | 7.166113000  | -1.171026000 | -0.285675000 |
| H | 7.409240000  | -2.150341000 | -0.238205000 |
| H | 7.751468000  | -0.680848000 | -0.947028000 |
| C | 1.565194000  | 1.631311000  | 1.100859000  |
| H | 0.937409000  | 2.519476000  | 1.218273000  |
| H | 2.561587000  | 1.968627000  | 0.809116000  |
| C | 1.675925000  | 0.914212000  | 2.467498000  |
| H | 2.171191000  | 1.606211000  | 3.157673000  |
| C | 0.343175000  | 0.458205000  | 3.068543000  |
| H | -0.355204000 | 1.295382000  | 3.171862000  |
| H | -0.137001000 | -0.310955000 | 2.459006000  |
| H | 0.499845000  | 0.035933000  | 4.065073000  |
| H | 2.345788000  | 0.056540000  | 2.359298000  |
| H | -3.026259000 | 1.891180000  | -1.565688000 |
| N | -2.550950000 | 1.584922000  | -0.719694000 |

**Structure S8a**

|   |              |              |              |
|---|--------------|--------------|--------------|
| C | 4.411463000  | -0.669525000 | 1.986266000  |
| C | 5.489343000  | -0.347466000 | -0.077033000 |
| N | 5.607791000  | -1.628538000 | 0.427331000  |
| N | 4.957848000  | -1.781630000 | 1.662659000  |
| C | 6.261894000  | -2.754536000 | -0.140933000 |
| C | 6.965719000  | -2.647841000 | -1.348378000 |
| C | 6.198963000  | -3.986442000 | 0.523503000  |
| C | 7.595315000  | -3.773453000 | -1.874263000 |
| H | 7.012747000  | -1.701267000 | -1.863770000 |
| C | 6.834669000  | -5.097817000 | -0.020110000 |
| H | 5.653989000  | -4.061325000 | 1.452885000  |
| C | 7.536856000  | -5.001475000 | -1.219950000 |
| H | 8.136638000  | -3.681190000 | -2.809229000 |
| H | 6.776970000  | -6.046100000 | 0.502558000  |
| H | 8.029723000  | -5.871049000 | -1.638932000 |
| O | 5.941546000  | 0.090041000  | -1.116386000 |
| C | 3.645640000  | -0.507546000 | 3.253381000  |
| H | 4.076283000  | 0.288400000  | 3.869939000  |
| H | 2.610099000  | -0.233878000 | 3.034464000  |
| H | 3.656637000  | -1.440132000 | 3.817691000  |
| C | 3.420689000  | 1.084746000  | 0.388717000  |
| N | 2.405470000  | 0.325613000  | 0.246175000  |
| C | 1.215315000  | 0.689304000  | -0.414453000 |
| C | -0.000085000 | 0.405929000  | 0.216881000  |
| C | 1.212154000  | 1.178354000  | -1.729009000 |
| C | -1.215471000 | 0.689355000  | -0.414489000 |
| C | -0.000034000 | 1.402067000  | -2.374813000 |
| C | -1.212250000 | 1.178400000  | -1.729045000 |
| H | -0.000129000 | -0.047722000 | 1.200586000  |
| H | -2.149755000 | 1.347392000  | -2.243666000 |
| H | -0.000012000 | 1.755387000  | -3.400019000 |
| H | 2.149686000  | 1.347317000  | -2.243591000 |
| N | -2.405615000 | 0.325713000  | 0.246165000  |
| C | -3.420911000 | 1.084776000  | 0.388553000  |
| C | -4.411571000 | -0.669354000 | 1.986309000  |
| C | -5.489340000 | -0.347734000 | -0.077109000 |
| N | -4.957760000 | -1.781587000 | 1.662809000  |
| N | -5.607630000 | -1.628761000 | 0.427408000  |
| C | -6.261493000 | -2.754930000 | -0.140785000 |
| C | -6.198572000 | -3.986720000 | 0.523867000  |
| C | -6.965081000 | -2.648506000 | -1.348392000 |
| C | -6.834050000 | -5.098249000 | -0.019697000 |
| H | -5.653780000 | -4.061399000 | 1.453371000  |
| C | -7.594451000 | -3.774269000 | -1.874225000 |
| H | -7.012109000 | -1.702016000 | -1.863942000 |
| C | -7.535998000 | -5.002178000 | -1.219700000 |
| H | -6.776361000 | -6.046441000 | 0.503138000  |
| H | -8.135589000 | -3.682213000 | -2.809318000 |
| H | -8.028685000 | -5.871873000 | -1.638642000 |
| O | -5.941554000 | 0.089581000  | -1.116538000 |

|   |              |              |              |
|---|--------------|--------------|--------------|
| C | -3.645842000 | -0.507090000 | 3.253444000  |
| H | -2.610300000 | -0.233411000 | 3.034538000  |
| H | -4.076559000 | 0.288955000  | 3.869819000  |
| H | -3.656819000 | -1.439566000 | 3.817935000  |
| C | 3.520267000  | 2.545057000  | 0.080833000  |
| C | 4.647586000  | 3.061185000  | -0.573261000 |
| C | 2.508753000  | 3.423266000  | 0.493390000  |
| C | 4.744113000  | 4.426922000  | -0.831111000 |
| H | 5.428637000  | 2.386851000  | -0.907064000 |
| C | 2.621599000  | 4.789236000  | 0.254803000  |
| H | 1.637743000  | 3.034972000  | 1.006743000  |
| C | 3.735917000  | 5.294254000  | -0.414541000 |
| H | 5.610923000  | 4.812704000  | -1.355698000 |
| H | 1.838707000  | 5.460388000  | 0.589518000  |
| H | 3.818781000  | 6.358050000  | -0.606775000 |
| C | -3.520609000 | 2.545040000  | 0.080498000  |
| C | -2.509208000 | 3.423391000  | 0.493025000  |
| C | -4.647939000 | 3.060986000  | -0.573724000 |
| C | -2.622172000 | 4.789324000  | 0.254283000  |
| H | -1.638196000 | 3.035234000  | 1.006479000  |
| C | -4.744583000 | 4.426685000  | -0.831730000 |
| H | -5.428896000 | 2.386534000  | -0.907510000 |
| C | -3.736497000 | 5.294159000  | -0.415190000 |
| H | -1.839368000 | 5.460591000  | 0.588971000  |
| H | -5.611395000 | 4.812328000  | -1.356417000 |
| H | -3.819451000 | 6.357926000  | -0.607546000 |
| C | 4.669040000  | 0.421481000  | 0.978337000  |
| H | 5.321983000  | 1.186190000  | 1.412596000  |
| C | -4.669221000 | 0.421469000  | 0.978210000  |
| H | -5.322294000 | 1.186169000  | 1.412287000  |

### Structure S8b

|   |             |              |              |
|---|-------------|--------------|--------------|
| C | 5.343891000 | 0.173174000  | 1.517207000  |
| C | 4.636604000 | 0.062636000  | 0.361508000  |
| C | 5.261884000 | -0.990244000 | -0.457715000 |
| N | 6.356469000 | -1.438392000 | 0.321130000  |
| C | 7.120718000 | -2.615287000 | 0.156524000  |
| C | 7.362162000 | -3.114927000 | -1.131232000 |
| C | 7.663362000 | -3.268438000 | 1.270881000  |
| C | 8.137279000 | -4.259595000 | -1.285182000 |
| H | 6.927505000 | -2.617738000 | -1.985433000 |
| C | 8.448028000 | -4.405558000 | 1.094246000  |
| H | 7.450699000 | -2.907065000 | 2.268605000  |
| C | 8.689653000 | -4.908792000 | -0.181358000 |
| H | 8.312823000 | -4.643601000 | -2.283805000 |
| H | 8.859769000 | -4.904566000 | 1.964403000  |
| H | 9.296338000 | -5.796827000 | -0.314194000 |
| O | 4.976222000 | -1.411812000 | -1.560967000 |
| C | 5.182732000 | 1.078585000  | 2.692930000  |
| H | 6.149835000 | 1.468656000  | 3.026191000  |

|   |              |              |              |
|---|--------------|--------------|--------------|
| H | 4.540601000  | 1.922472000  | 2.447746000  |
| H | 4.738665000  | 0.535868000  | 3.532968000  |
| C | 3.408504000  | 0.789098000  | -0.046682000 |
| N | 2.404526000  | 0.069136000  | -0.374647000 |
| C | 1.216169000  | 0.554903000  | -0.946836000 |
| C | 0.000012000  | 0.157658000  | -0.380113000 |
| C | 1.212543000  | 1.286069000  | -2.144933000 |
| C | -1.216140000 | 0.554924000  | -0.946831000 |
| C | 0.000022000  | 1.628035000  | -2.736064000 |
| C | -1.212503000 | 1.286074000  | -2.144940000 |
| H | 0.000006000  | -0.477611000 | 0.497362000  |
| H | -2.150781000 | 1.541236000  | -2.621091000 |
| H | 0.000026000  | 2.166391000  | -3.677779000 |
| H | 2.150827000  | 1.541227000  | -2.621076000 |
| N | -2.404491000 | 0.069170000  | -0.374614000 |
| C | -3.408483000 | 0.789107000  | -0.046626000 |
| C | -5.343788000 | 0.173029000  | 1.517301000  |
| C | -5.261818000 | -0.990276000 | -0.457692000 |
| C | -4.636547000 | 0.062584000  | 0.361565000  |
| N | -6.356429000 | -1.438421000 | 0.321118000  |
| C | -7.120720000 | -2.615279000 | 0.156434000  |
| C | -7.663384000 | -3.268486000 | 1.270748000  |
| C | -7.362181000 | -3.114824000 | -1.131355000 |
| C | -8.448088000 | -4.405569000 | 1.094036000  |
| H | -7.450710000 | -2.907187000 | 2.268496000  |
| C | -8.137336000 | -4.259457000 | -1.285382000 |
| H | -6.927507000 | -2.617593000 | -1.985523000 |
| C | -8.689730000 | -4.908709000 | -0.181601000 |
| H | -8.859845000 | -4.904622000 | 1.964160000  |
| H | -8.312892000 | -4.643390000 | -2.284030000 |
| H | -9.296445000 | -5.796716000 | -0.314497000 |
| O | -4.976214000 | -1.411737000 | -1.560999000 |
| C | -5.182606000 | 1.078369000  | 2.693076000  |
| H | -4.540201000 | 1.922087000  | 2.448031000  |
| H | -6.149667000 | 1.468704000  | 3.026153000  |
| H | -4.738853000 | 0.535513000  | 3.533190000  |
| C | 3.472683000  | 2.288896000  | -0.037924000 |
| C | 4.593354000  | 2.946734000  | -0.562234000 |
| C | 2.439735000  | 3.055256000  | 0.518061000  |
| C | 4.669078000  | 4.337462000  | -0.553628000 |
| H | 5.401045000  | 2.364526000  | -0.991162000 |
| C | 2.527083000  | 4.444011000  | 0.547911000  |
| H | 1.570210000  | 2.558408000  | 0.930024000  |
| C | 3.638071000  | 5.090217000  | 0.006325000  |
| H | 5.533961000  | 4.832538000  | -0.980980000 |
| H | 1.725188000  | 5.024152000  | 0.990707000  |
| H | 3.700108000  | 6.172529000  | 0.022037000  |
| C | -3.472701000 | 2.288905000  | -0.037733000 |
| C | -2.439805000 | 3.055251000  | 0.518372000  |
| C | -4.593375000 | 2.946757000  | -0.562019000 |
| C | -2.527197000 | 4.444001000  | 0.548341000  |

|   |              |              |              |
|---|--------------|--------------|--------------|
| H | -1.570281000 | 2.558398000  | 0.930328000  |
| C | -4.669143000 | 4.337482000  | -0.553294000 |
| H | -5.401030000 | 2.364564000  | -0.991032000 |
| C | -3.638182000 | 5.090221000  | 0.006765000  |
| H | -1.725337000 | 5.024128000  | 0.991218000  |
| H | -5.534025000 | 4.832568000  | -0.980636000 |
| H | -3.700253000 | 6.172529000  | 0.022569000  |
| H | -7.252129000 | -0.501923000 | 1.874575000  |
| H | 7.252214000  | -0.501809000 | 1.874505000  |
| N | 6.329736000  | -0.805075000 | 1.572671000  |
| N | -6.329664000 | -0.805194000 | 1.572704000  |

### Structure S9a

|   |              |              |              |
|---|--------------|--------------|--------------|
| C | -4.236661000 | 0.078823000  | 2.009236000  |
| C | -5.320718000 | -0.215031000 | -0.053297000 |
| N | -5.452340000 | 1.057504000  | 0.478610000  |
| N | -4.790201000 | 1.193133000  | 1.706138000  |
| C | -6.114351000 | 2.189075000  | -0.067401000 |
| C | -6.826840000 | 2.096150000  | -1.270943000 |
| C | -6.051835000 | 3.412170000  | 0.613174000  |
| C | -7.465189000 | 3.226059000  | -1.776536000 |
| H | -6.872910000 | 1.156566000  | -1.799117000 |
| C | -6.696467000 | 4.528156000  | 0.089819000  |
| H | -5.499814000 | 3.477404000  | 1.539195000  |
| C | -7.407247000 | 4.445337000  | -1.105964000 |
| H | -8.012758000 | 3.144204000  | -2.708854000 |
| H | -6.638643000 | 5.469505000  | 0.624917000  |
| H | -7.906860000 | 5.318428000  | -1.509361000 |
| O | -5.778993000 | -0.638603000 | -1.093467000 |
| C | -3.450607000 | -0.096945000 | 3.263113000  |
| H | -3.881399000 | -0.886310000 | 3.888267000  |
| H | -2.420701000 | -0.386493000 | 3.032547000  |
| H | -3.437008000 | 0.834453000  | 3.829398000  |
| C | -3.218537000 | -1.607899000 | 0.376805000  |
| N | -2.418722000 | -0.783251000 | -0.168760000 |
| C | -1.213839000 | -1.165675000 | -0.792513000 |
| C | 0.000282000  | -0.860562000 | -0.168800000 |
| C | -1.212528000 | -1.725401000 | -2.077181000 |
| C | 1.214273000  | -1.165637000 | -0.792733000 |
| C | 0.000062000  | -1.991425000 | -2.707271000 |
| C | 1.212749000  | -1.725327000 | -2.077427000 |
| H | 0.000339000  | -0.368069000 | 0.796157000  |
| C | -2.999567000 | -3.099406000 | 0.538706000  |
| H | -3.291679000 | -3.376775000 | 1.559553000  |
| H | -1.928792000 | -3.293391000 | 0.443052000  |
| C | -3.749980000 | -4.019426000 | -0.455977000 |
| H | -3.355309000 | -5.029666000 | -0.302685000 |
| C | -5.275833000 | -4.051262000 | -0.323776000 |
| H | -5.582399000 | -4.299741000 | 0.698441000  |
| H | -5.731691000 | -3.100140000 | -0.605852000 |

|   |              |              |              |
|---|--------------|--------------|--------------|
| H | -5.693311000 | -4.818509000 | -0.981446000 |
| H | -3.474678000 | -3.735945000 | -1.475360000 |
| H | 2.152777000  | -1.908864000 | -2.582813000 |
| H | -0.000030000 | -2.407790000 | -3.708684000 |
| H | -2.152634000 | -1.908998000 | -2.582401000 |
| N | 2.419342000  | -0.783222000 | -0.169280000 |
| C | 3.218593000  | -1.607766000 | 0.377241000  |
| C | 4.237036000  | 0.078916000  | 2.009331000  |
| C | 5.320981000  | -0.215232000 | -0.053218000 |
| N | 4.790417000  | 1.193232000  | 1.705964000  |
| N | 5.452434000  | 1.057448000  | 0.478391000  |
| C | 6.114417000  | 2.188947000  | -0.067808000 |
| C | 6.051946000  | 3.412120000  | 0.612629000  |
| C | 6.826810000  | 2.095885000  | -1.271398000 |
| C | 6.696538000  | 4.528047000  | 0.089098000  |
| H | 5.499994000  | 3.477459000  | 1.538684000  |
| C | 7.465120000  | 3.225738000  | -1.777167000 |
| H | 6.872846000  | 1.156239000  | -1.799461000 |
| C | 7.407230000  | 4.445092000  | -1.106727000 |
| H | 6.638752000  | 5.469459000  | 0.624091000  |
| H | 8.012619000  | 3.143781000  | -2.709516000 |
| H | 7.906813000  | 5.318136000  | -1.510261000 |
| O | 5.779378000  | -0.639012000 | -1.093247000 |
| C | 3.451159000  | -0.096739000 | 3.263339000  |
| H | 2.421210000  | -0.386292000 | 3.032956000  |
| H | 3.882028000  | -0.886066000 | 3.888485000  |
| H | 3.437643000  | 0.834700000  | 3.829558000  |
| C | 2.998945000  | -3.099058000 | 0.540264000  |
| H | 1.928051000  | -3.292641000 | 0.445123000  |
| H | 3.291344000  | -3.375971000 | 1.561142000  |
| C | 3.748611000  | -4.019911000 | -0.454221000 |
| H | 3.353927000  | -5.030000000 | -0.299961000 |
| H | 3.472692000  | -3.737119000 | -1.473626000 |
| C | 5.274544000  | -4.051783000 | -0.322922000 |
| H | 5.581702000  | -4.299732000 | 0.699246000  |
| H | 5.691575000  | -4.819415000 | -0.980425000 |
| H | 5.730320000  | -3.100839000 | -0.605745000 |
| C | -4.486695000 | -0.994170000 | 0.976968000  |
| H | -5.119918000 | -1.780188000 | 1.399515000  |
| C | 4.486975000  | -0.994203000 | 0.977181000  |
| H | 5.120039000  | -1.780319000 | 1.399754000  |

### Structure S9b

|   |             |              |              |
|---|-------------|--------------|--------------|
| C | 4.702194000 | -1.696327000 | 0.761640000  |
| C | 4.343665000 | -0.490028000 | 0.254652000  |
| C | 5.478961000 | 0.030583000  | -0.525004000 |
| N | 6.465217000 | -0.978551000 | -0.430742000 |
| C | 7.841765000 | -0.876180000 | -0.734529000 |
| C | 8.258319000 | -0.070855000 | -1.803673000 |
| C | 8.786938000 | -1.597480000 | 0.005982000  |



|   |               |              |              |
|---|---------------|--------------|--------------|
| C | 9.612296000   | 0.007146000  | -2.112481000 |
| H | 7.526866000   | 0.491695000  | -2.364512000 |
| C | 10.136814000  | -1.516759000 | -0.327794000 |
| H | 8.470379000   | -2.198031000 | 0.848819000  |
| C | 10.558392000  | -0.714790000 | -1.385209000 |
| H | 9.927205000   | 0.636580000  | -2.937167000 |
| H | 10.860256000  | -2.077853000 | 0.253152000  |
| H | 11.610011000  | -0.651246000 | -1.638990000 |
| O | 5.628117000   | 1.097820000  | -1.089067000 |
| C | 3.927405000   | -2.702778000 | 1.546724000  |
| H | 4.300770000   | -2.771717000 | 2.573010000  |
| H | 2.871367000   | -2.438228000 | 1.577169000  |
| H | 4.010813000   | -3.698546000 | 1.099057000  |
| C | 3.054797000   | 0.231722000  | 0.404762000  |
| N | 2.434436000   | 0.507381000  | -0.674254000 |
| C | 1.215961000   | 1.215070000  | -0.706758000 |
| C | 0.000012000   | 0.533044000  | -0.575116000 |
| C | 1.213697000   | 2.585165000  | -0.999173000 |
| C | -1.215944000  | 1.215062000  | -0.706736000 |
| C | -0.000002000  | 3.253441000  | -1.136000000 |
| C | -1.213694000  | 2.585157000  | -0.999151000 |
| H | 0.000016000   | -0.537644000 | -0.405123000 |
| C | 2.605484000   | 0.616679000  | 1.807746000  |
| H | 2.980270000   | -0.124077000 | 2.521157000  |
| H | 1.513584000   | 0.590170000  | 1.844451000  |
| C | 3.074836000   | 2.020621000  | 2.258967000  |
| H | 2.628659000   | 2.207819000  | 3.242206000  |
| C | 4.592610000   | 2.204757000  | 2.344891000  |
| H | 5.050516000   | 1.452713000  | 2.995986000  |
| H | 5.067259000   | 2.139454000  | 1.363279000  |
| H | 4.832271000   | 3.188005000  | 2.759159000  |
| H | 2.649376000   | 2.766027000  | 1.581783000  |
| H | -2.156174000  | 3.099404000  | -1.141752000 |
| H | -0.000008000  | 4.313074000  | -1.368298000 |
| H | 2.156171000   | 3.099418000  | -1.141789000 |
| N | -2.434410000  | 0.507360000  | -0.674209000 |
| C | -3.054797000  | 0.231787000  | 0.404815000  |
| C | -4.702244000  | -1.696177000 | 0.761927000  |
| C | -5.478882000  | 0.030499000  | -0.525111000 |
| C | -4.343657000  | -0.489976000 | 0.254735000  |
| N | -6.465190000  | -0.978579000 | -0.430670000 |
| C | -7.841718000  | -0.876228000 | -0.734541000 |
| C | -8.786946000  | -1.597371000 | 0.006053000  |
| C | -8.258202000  | -0.071086000 | -1.803851000 |
| 6 | -10.136803000 | -1.516682000 | -0.327806000 |
| H | -8.470448000  | -2.197773000 | 0.849019000  |
| C | -9.612161000  | 0.006887000  | -2.112742000 |
| H | -7.526708000  | 0.491346000  | -2.364755000 |
| 6 | -10.558310000 | -0.714896000 | -1.385388000 |
| 1 | -10.860287000 | -2.077654000 | 0.253206000  |
| H | -9.927014000  | 0.636178000  | -2.937558000 |

|   |               |              |              |
|---|---------------|--------------|--------------|
| I | -11.609915000 | -0.651376000 | -1.639235000 |
| O | -5.628001000  | 1.097644000  | -1.089355000 |
| C | -3.927545000  | -2.702479000 | 1.547294000  |
| H | -2.871387000  | -2.438339000 | 1.577161000  |
| H | -4.300520000  | -2.770652000 | 2.573774000  |
| H | -4.011550000  | -3.698481000 | 1.100266000  |
| C | -2.605532000  | 0.616892000  | 1.807774000  |
| H | -1.513632000  | 0.590437000  | 1.844505000  |
| H | -2.980297000  | -0.123816000 | 2.521245000  |
| C | -3.074961000  | 2.020853000  | 2.258855000  |
| H | -2.628845000  | 2.208150000  | 3.242103000  |
| H | -2.649492000  | 2.766218000  | 1.581633000  |
| C | -4.592746000  | 2.204942000  | 2.344681000  |
| H | -5.050663000  | 1.452938000  | 2.995815000  |
| H | -4.832466000  | 3.188217000  | 2.758850000  |
| H | -5.067339000  | 2.139537000  | 1.363048000  |
| H | 6.196031000   | -2.916759000 | 0.063372000  |
| N | 6.026286000   | -1.986980000 | 0.440285000  |
| H | -6.196104000  | -2.916697000 | 0.063860000  |
| N | -6.026324000  | -1.986844000 | 0.440570000  |
